# Supplementary material for: Interrogation of the Pathogen Box reveals small molecule ligands against the mycobacterial trehalose transporter LpqY-SugABC
Source: Royal Society of Chemistry journal article supplement (doi:10.1039/d2md00104g), 2022-01-01
Supplement: d2md00104g1.pdf [file d2md00104g1.pdf]

# **Interrogation of the Pathogen Box reveals small molecule ligands against the mycobacterial trehalose transporter LpqY-SugABC**

Anjana Radhakrishnan,<sup>‡a</sup> Chelsea M Brown,<sup>‡a</sup> Collette S Guy,<sup>‡a</sup> Charlotte Cooper,<sup>a</sup>

Raul Pacheco-Gomez,<sup>c</sup> Phillip J Stansfeld,<sup>ab</sup> Elizabeth Fullam<sup>\*a</sup>

<sup>a</sup> School of Life Sciences, University of Warwick, Coventry, CV4 7AL, UK

<sup>b</sup> Department of Chemistry, University of Warwick, CV4 7AL, UK

<sup>c</sup> Malvern Panalytical Ltd, Enigma Business Park, Grovewood Road, Malvern, WR14 1XZ, United Kingdom

<sup>‡</sup> These authors contributed equally to this study

\*Email for correspondence: [e.fullam@warwick.ac.uk](mailto:e.fullam@warwick.ac.uk); (Tel. +44 (0)2476 574239)

**Fig. S1. Binding affinity of trehalose for LpqY.**  $K_d$  measured by microscale thermophoresis (MST). Fnorm (%) is the normalised fluorescence signal of the change in MST signal. Error bars represent standard deviations from at least three independent experiments. Error bars that cannot be observed are within the symbol. Trehalose in 10 % DMSO ( $K_d 36.1 \pm 0.5$  mM).

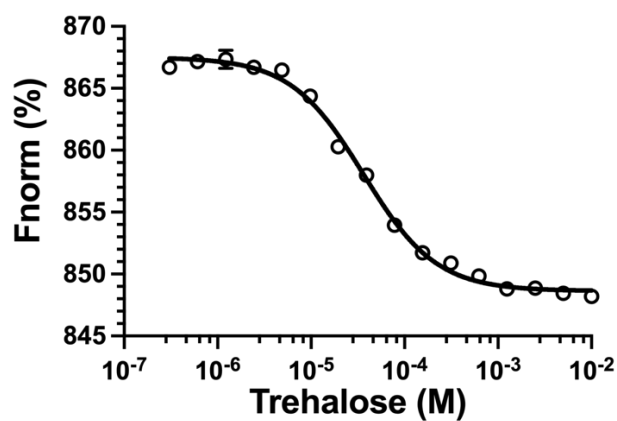

**Fig. S2. Docking scores of LpqY hits.** The hit compounds and trehalose were docked into the LpqY crystal structure (PDB 7APE) with AutoDock VINA. The docking score of trehalose is indicated with the dashed line.

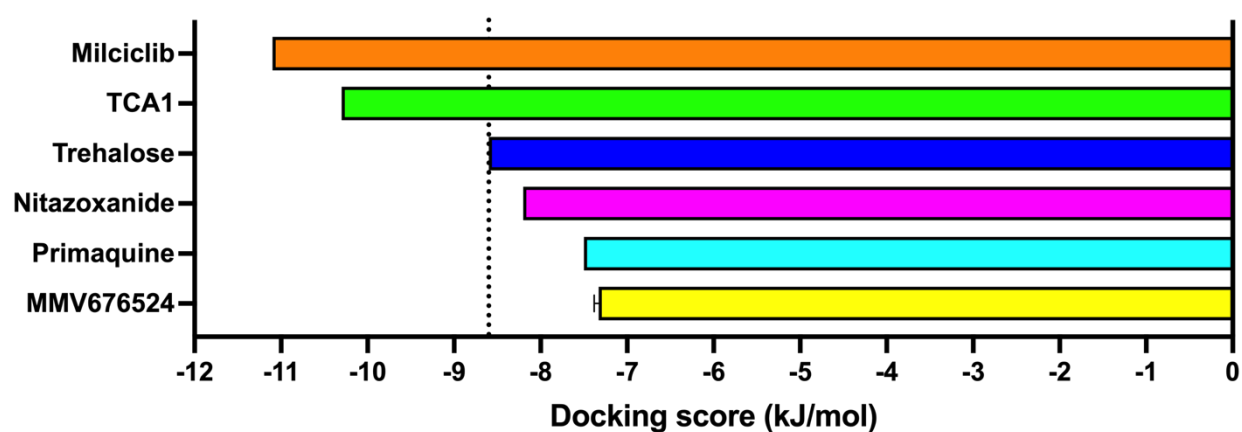

**Fig. S3. Comparison of the LpqY-trehalose crystal structure with the docked pose.** Illustration of the LpqY trehalose binding site showing trehalose (crystal structure PDB 7APE: green carbon atoms), docked pose (blue carbon atoms) and the interacting residues in stick representation in grey.

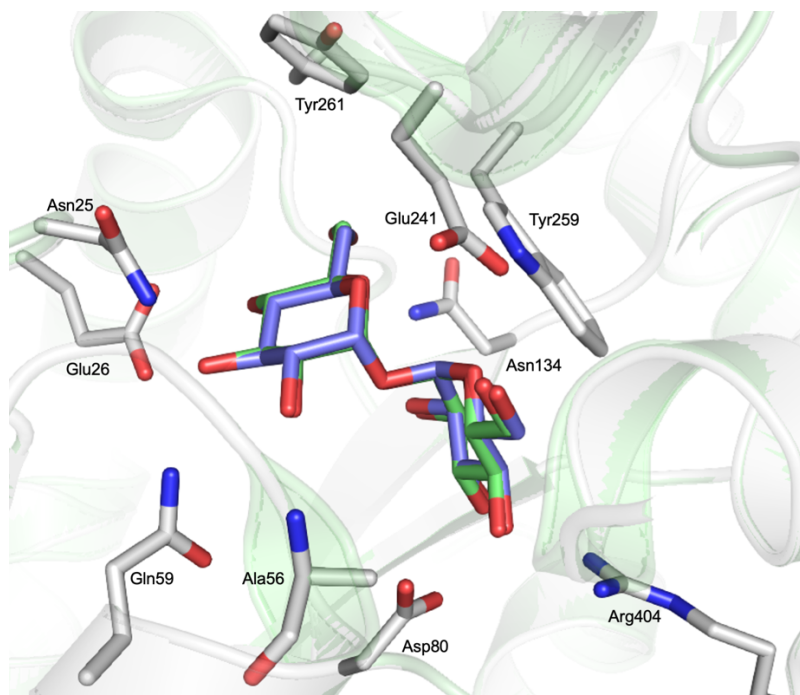

**Fig. S4. Comparison of the binding site of trehalose with the docked hit compounds.** Close-up illustration showing the superposition of the binding orientation of the trehalose ligand in relation to the hit compounds in stick representation. A) Overlay TCA1 (green carbon atoms), B) Nitazoxanide (magenta carbon atoms), C) MMV676524 (yellow carbon atoms), D) primaquine (cyan carbon atoms), E) milciclib (orange carbon atoms), F) Overlay of all hits with trehalose. Trehalose is illustrated with grey carbon atoms. The LpqY Arg404 is highlighted with pale blue carbon atoms.

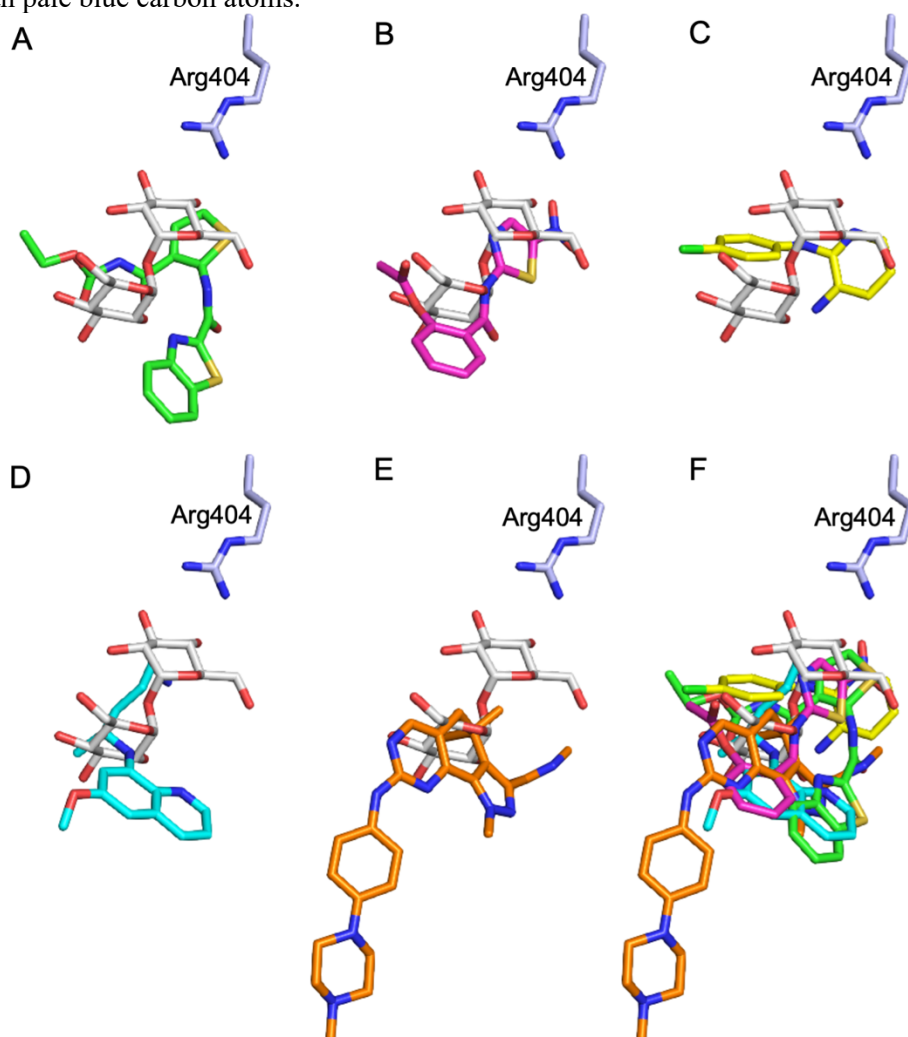

**Table S1: Pathogen Box compounds with a signal to noise threshold > 5 to LpqY**

| Compound Number | MMV ID    | Compound name                                               | Disease set    | Structure                                                                             | Screen signal/noise ratio | Validation Binding score |
|-----------------|-----------|-------------------------------------------------------------|----------------|---------------------------------------------------------------------------------------|---------------------------|--------------------------|
| 46              | MMV090930 | TCA1                                                        | Tuberculosis   | 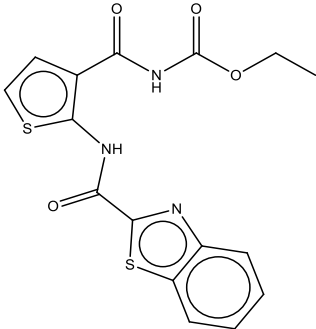   | 29.5                      | 91.5                     |
| 74              | MMV688798 | N-benzyl-2-methylsulfonyl-N-phenylbenzamide                 | Kinetoplastids |    | 5.2                       | 1.3                      |
| 75              | MMV676539 | N-[2-(1H-indol-3-yl)ethyl]-2-oxochromene-3-carboxamide      | Tuberculosis   |   | 6.2                       | 6.4                      |
| 76              | MMV202458 | N-(4-chloro-2-methylphenyl)-2-(4-methoxyphenoxy)propanamide | Tuberculosis   |  | 5.5                       | 6.3                      |
| 77              | MMV676474 | 2-cyclopropyl-1-[4-(2-methoxyphenoxy)butyl]benzimidazole    | Tuberculosis   |  | 6.0                       | 6.2                      |

|     |           |                                                                                                                     |           |                                                                                       |      |      |
|-----|-----------|---------------------------------------------------------------------------------------------------------------------|-----------|---------------------------------------------------------------------------------------|------|------|
| 123 | MMV000011 | Doxycycline                                                                                                         | Reference | 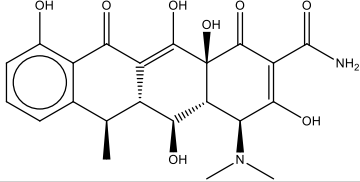   | 5.8  | 6.5  |
| 124 | MMV687775 | 5-(3,5-dichloro-4-fluorophenyl)-3-(1-hydroxy-3,3-dimethyl-2,1-benzoxaborol-5-yl)-5-(trifluoromethyl)-4H-1,2-oxazole | Helminths |    | 6.6  | 3.9  |
| 133 | MMV003270 | Zoxazolamine                                                                                                        | Helminths |    | 6.9  | 4.5  |
| 136 | MMV020321 | N-[2-chloro-5-(trifluoromethyl)phenyl]-2-[1-(2-methoxyphenyl)ethylamino]acetamide                                   | Malaria   |    | 5.5  | 1.9  |
| 142 | MMV688991 | Nitazoxanide                                                                                                        | Reference |   | 8.3  | 20.0 |
| 150 | MMV000023 | Primaquine                                                                                                          | Reference |  | 10.0 | 21.6 |

|     |           |                                                                                                                |                |                                                                                       |      |      |
|-----|-----------|----------------------------------------------------------------------------------------------------------------|----------------|---------------------------------------------------------------------------------------|------|------|
| 151 | MMV676602 | Milciclib                                                                                                      | Kinetoplastids | 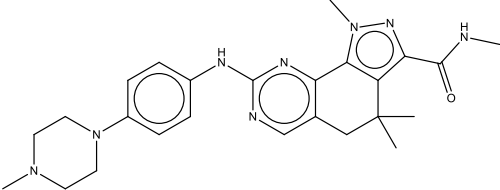   | 9.5  | 13.6 |
| 246 | MMV031011 | 7-chloro-N-methyl-1'-(2-phenylethyl)spiro[2,3,4,9-tetrahydropyrido[3,4-b]indole-1,4'-piperidine]-3-carboxamide | Malaria        |    | 5.7  | 3.7  |
| 248 | MMV688362 | 2-[4-[5-(4,5-dihydro-1H-imidazol-2-yl)-7-methoxy-1-benzofuran-2-yl]phenyl]-4,5-dihydro-1H-imidazole            | Kinetoplastids |    | 12.6 | 14.8 |
| 277 | MMV688407 | 4-[4-(4,5-dihydro-1H-imidazol-2-yl)-2-methoxyphenyl]-1-[3-(4,5-dihydro-1H-imidazol-2-yl)phenyl]triazole        | Kinetoplastids |   | 8.0  | 13.3 |
| 280 | MMV024406 | 5-chloro-N-(3-chlorophenyl)-6-(4-pyridin-4-ylpiperazin-1-yl)pyridine-3-carboxamide                             | Malaria        |  | 5.2  | 2.3  |



|     |           |                                                                             |              |                                                                                     |     |      |
|-----|-----------|-----------------------------------------------------------------------------|--------------|-------------------------------------------------------------------------------------|-----|------|
| 319 | MMV675996 | N-(4-methoxyphenyl)-N-[2-(6-methylpyridin-2-yl)ethyl]cyclohexanecarboxamide | Helminths    | 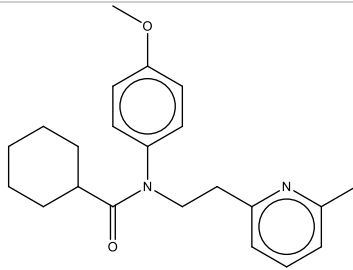 | 6.0 | 4.9  |
| 349 | MMV676524 | 2-N-(4-chlorophenyl)pyridine-2,3-diamine                                    | Tuberculosis |  | 6.4 | 12.2 |
| 402 |           | Trehalose                                                                   | N/A          |  | 6.7 | 8.3  |

**Table S2: Binding affinities for trehalose with LpqY**

| Compound               | $K_d$ $\mu$ M  |
|------------------------|----------------|
| Trehalose              | $36.1 \pm 0.5$ |
| TCA1                   | $14.2 \pm 0.8$ |
| Nitazoxanide           | $85.4 \pm 3.4$ |
| Primaquine             | ND             |
| MMV676524              | ND             |
| Milciclib <sup>a</sup> | ND             |

Mean  $\pm$  SD are from at least three independent experiments.

All assays were undertaken with 10% DMSO final concentration, apart from miciclib<sup>a</sup>: 20% DMSO final concentration

ND: Not able to determine  $K_d$  due to maximum solubility of the compounds (MMV676524 and milciclib) or fluorescence quenching of LpqY (primaquine).
