# Supplementary material for: Interrogation of the Pathogen Box reveals small molecule ligands against the mycobacterial trehalose transporter LpqY-SugABC
Source: RSC Med Chem. 2022 Aug 16;13(10):1225–33. doi: 10.1039/d2md00104g (PMC9579956; doi:10.1039/d2md00104g)
Supplement: MD-013-D2MD00104G-s002 [file MD-013-D2MD00104G-s002.xlsx]

## Sheet: LpqY Pathogen Box Screen
Compound Number	Rack	Position	Compound ID	Disease Set	Trivial Name	Total Molecular Weight (Da)	Molecular Weight Parent Molecule (Da)	Molecular Formula	Salt Name	Salt Coefficient	cLogP	SMILES	Pathogen Box screen signal/noise ratio	Hit validation Binding score
1	PathogenBox_PlateA	A02	MMV010764	MALARIA		320.437	320.437	C14H16N4OS2			2.5419	C(Nc1nn2c(cnc2s1)c3cccs3)C4CCOCC4	0.666667
2	PathogenBox_PlateA	A03	MMV688472	TOXOPLASMOSIS		393.823	393.823	C21H16N3O3Cl			4.0012	CC(Oc1cccc(Cl)c1)C(=O)Nc1ccc2oc(nc2c1)-c1ccncc1	0.722222
3	PathogenBox_PlateA	A04	MMV688416	DENGUE		456.988	456.988	C23H25N4O2ClS			5.9284	CC(C)(C)OC(=O)N1CCN(CC1)c2nccc(n2)c3ccc(s3)c4ccc(Cl)cc4	0.333333
4	PathogenBox_PlateA	A05	MMV689758	REFERENCE COMPOUNDS	Bedaquiline	669.555	555.505	C32H31N2O2Br	Fumarate	1	7.1699	COc1nc2ccc(Br)cc2cc1[C@@H](c3ccccc3)[C@@](O)(CCN(C)C)c4cccc5ccccc45	0.444444
5	PathogenBox_PlateA	A06	MMV688796	KINETOPLASTIDS		354.378	354.378	C19H19N4O2F			3.1351	Fc1ccc(cc1)c2oc(cc2)C(=O)NCc3nnc4CCCCCn34	0.277778
6	PathogenBox_PlateA	A07	MMV676526	TUBERCULOSIS		385.816	385.816	C21H17NO3ClF			5.0331	COc1ccc(cc1)c2cc(NC(=O)c3ccc(F)cc3Cl)ccc2OC	0.555556
7	PathogenBox_PlateA	A08	MMV688553	TUBERCULOSIS		343.377	343.377	C18H21N3O4			1.8108	O=C(NCc1cocc1)N2CCN(Cc3ccc4OCOc4c3)CC2	0.777778
8	PathogenBox_PlateA	A09	MMV676501	TUBERCULOSIS		346.212	346.212	C11H5N3O2Cl2S2			4.5132	Clc1ccc(s1)C(=O)Nc2oc(nn2)c3ccc(Cl)s3	0.555556
9	PathogenBox_PlateA	A10	MMV676449	TUBERCULOSIS		344.835	344.835	C19H21N2O2Cl			3.6982	CCc1nc2ccccc2n1CC(O)COc3cc(C)ccc3Cl	1.22222
10	PathogenBox_PlateA	A11	MMV676412	TUBERCULOSIS		344.772	344.772	C16H9N2O3ClS			3.1732	Clc1ccc(cc1)S(=O)(=O)c2oc(nc2C#N)c3ccccc3	0.574074
11	PathogenBox_PlateA	B02	MMV1110498	WOLBACHIA LF		327.306	327.306	C15H16N3O2F3			2.3267	FC(F)(F)C1=C(C(N2CCCCC2)=O)N(C=CC=C3OC)C3=N1	1.48148
12	PathogenBox_PlateA	B03	MMV000907	MALARIA		457.285	231.254	C11H13N5O	Trifluoroacetate	2	0.5722	COc1cccc2c(C)nc(N=C(N)N)nc12	1.09259
13	PathogenBox_PlateA	B04	MMV688889	TUBERCULOSIS		349.817	349.817	C19H16N5Cl			3.4621	Clc1ccc(CCNc2cc(nc3ncnn23)c4ccccc4)cc1	3.04167
14	PathogenBox_PlateA	B05	MMV688776	KINETOPLASTIDS		313.781	313.781	C17H16N3OCl			3.8977	Cc1nn2C(=O)C3=C(CCCC3)Nc2c1c4ccc(Cl)cc4	1.54167
15	PathogenBox_PlateA	B06	MMV688934	KINETOPLASTIDS	Tolfenpyrad	383.871	383.871	C21H22N3O2Cl			3.7918	CCc1nn(C)c(C(=O)NCc2ccc(Oc3ccc(C)cc3)cc2)c1Cl	1.5
16	PathogenBox_PlateA	B07	MMV676389	TUBERCULOSIS		368.43	368.43	C20H24N4O3			2.1312	O=C(N1CCN(Cc2ccc3OCOc3c2)CC1)c4[nH]nc5CCCCc45	1.66667
17	PathogenBox_PlateA	B08	MMV676603	TUBERCULOSIS		431.386	431.386	C17H16N3O5F3S			1.2897	CC1COC2(CCN(CC2)C3=NC(=O)c4cc(cc(c4S3)[N+](=O)[O-])C(F)(F)F)O1	1.83333
18	PathogenBox_PlateA	B09	MMV676401	TUBERCULOSIS		308.378	308.378	C18H20N4O			3.221	C(Nc1nc(nc2ccccc12)N3CCCCC3)c4occc4	1.875
19	PathogenBox_PlateA	B10	MMV102872	TUBERCULOSIS		367.714	367.714	C16H9N3O2ClF3			4.456	FC(F)(F)c1cccc(c1)C(=O)Nc2oc(nn2)c3ccc(Cl)cc3	0.75
20	PathogenBox_PlateA	B11	MMV676477	TUBERCULOSIS		383.467	383.467	C19H21N5O2S			3.2764	CCC1=C(C)N=C(NC1=O)n2nc(C)cc2NC(=O)c3ccccc3SC	0.6875
21	PathogenBox_PlateA	C02	MMV084603	MALARIA		377.51	377.51	C22H23N3OS			3.5308	O=C1N(Cc2cc3ccccc3s2)CC4CN(Cc5ccccc5)CCN14	1.3125
22	PathogenBox_PlateA	C03	MMV688548	TOXOPLASMOSIS		267.329	267.329	C15H17N5			2.0496	CC(C)(C)n1nc(-c2ccccc2)c2c(N)ncnc12	1
23	PathogenBox_PlateA	C04	MMV688888	TUBERCULOSIS		349.405	349.405	C20H20N5F			2.7193	CN1CCN(CC1)c2cc(nc(n2)c3ccncc3)c4ccc(F)cc4	2.625
24	PathogenBox_PlateA	C05	MMV690028	KINETOPLASTIDS		546.661	546.661	C30H38N6O4			5.048	COC1=C(OCCCCOC2=CC=C(C3=NNN=N3)C=C2)C=C(C4=NN(C5CCCCCC5)C(C4(C)C)=O)C=C1	2.5
25	PathogenBox_PlateA	C06	MMV688943	KINETOPLASTIDS	Difenoconazol	406.263	406.263	C19H17N3O3Cl2			3.5513	CC1COC(Cn2cncn2)(O1)c3ccc(Oc4ccc(Cl)cc4)cc3Cl	0.75
26	PathogenBox_PlateA	C07	MMV053220	TUBERCULOSIS		252.273	252.273	C15H12N2O2			1.8166	NC(=O)COc1ccc(cc1)c2ccc(cc2)C#N	0.638889
27	PathogenBox_PlateA	C08	MMV676584	TUBERCULOSIS		314.786	314.786	C12H8N2OClFS2			2.9308	Fc1ccc2c(Cl)c(sc2c1)C(=O)NC3=NCCS3	1.05556
28	PathogenBox_PlateA	C09	MMV676439	TUBERCULOSIS		302.822	302.822	C16H15N2ClS			3.664	Cc1ccc2nc(Cl)c(CNCc3cccs3)cc2c1	0.277778
29	PathogenBox_PlateA	C10	MMV676395	TUBERCULOSIS		307.303	307.303	C17H13N3O3			0.9946	OC1=C(C(=O)Nc2cccnc2)C(=O)N3CCc4cccc1c34	2.08333
30	PathogenBox_PlateA	C11	MMV676379	TUBERCULOSIS		321.166	321.166	C15H13O3Br			3.2047	COc1cccc(OCC(=O)c2ccc(Br)cc2)c1	-0.0277778
31	PathogenBox_PlateA	D02	MMV687762	KINETOPLASTIDS		320.385	320.385	C20H20N2O2			3.7258	C1CC(CCO1)c2cc(n[nH]2)c3ccc(Oc4ccccc4)cc3	0.598039
32	PathogenBox_PlateA	D03	MMV1028806	MALARIA		339.392	339.392	C18H14N3OFS			3.9922	Fc1ccccc1C2CC2C(=O)Nc3nc(cs3)c4ccccn4	0.22549
33	PathogenBox_PlateA	D04	MMV661713	TUBERCULOSIS		435.334	435.334	C21H19N6Br			3.3044	Brc1cncc(c1)c2cc(NCCCn3ccnc3)nc(n2)c4ccccc4	0.5
34	PathogenBox_PlateA	D05	MMV688793	KINETOPLASTIDS		337.372	337.372	C19H19N3O3			3.0557	Cc1onc(C)c1COc2cccc(c2)C(=O)Nc3ncccc3C	0.382353
35	PathogenBox_PlateA	D06	MMV688942	KINETOPLASTIDS	Bitertanol	337.416	337.416	C20H23N3O2			3.7417	CC(C)(C)C(O)C(Oc1ccc(cc1)c2ccccc2)n3cncn3	0.45098
36	PathogenBox_PlateA	D07	MMV688554	TUBERCULOSIS		321.395	321.395	C15H19N3O3S			1.9636	CNc1snc(C)c1C(=O)NCCOc2ccc(OC)cc2	0.833333
37	PathogenBox_PlateA	D08	MMV676555	TUBERCULOSIS		283.755	283.755	C16H14N3Cl			3.4446	Cc1nnc(NCc2cccc(Cl)c2)c3ccccc13	0.884615
38	PathogenBox_PlateA	D09	MMV676383	TUBERCULOSIS		319.402	319.402	C14H13N3O2S2			3.7599	CCC(Sc1oc2ccccc2n1)C(=O)Nc3nccs3	0.820513
39	PathogenBox_PlateA	D10	MMV676444	TUBERCULOSIS		345.436	345.436	C19H27N3O3			2.8137	O=C(NC1CCCCC1)N2CCN(Cc3ccc4OCOc4c3)CC2	1.33333
40	PathogenBox_PlateA	D11	MMV676409	TUBERCULOSIS		329.349	329.349	C16H12N3O2FS			2.9484	Fc1cccc(OCC(=O)Nc2nc(cs2)c3ccccn3)c1	0.448718
41	PathogenBox_PlateA	E02	MMV688514	KINETOPLASTIDS		263.294	263.294	C16H13N3O			2.2586	NC(=N)c1ccc(cc1)c2cc(on2)c3ccccc3	1.14103
42	PathogenBox_PlateA	E03	MMV676350	MALARIA		345.846	345.846	C17H16N3OClS			3.526	Cc1cnc(CCNC(=O)c2cc(cs2)c3ccc(Cl)cc3)[nH]1	1.34615
43	PathogenBox_PlateA	E04	MMV553002	TUBERCULOSIS		239.249	239.249	C10H9NO4S			-0.3113	CS(=O)(=O)CC1=Nc2ccccc2OC1=O	3.2381
44	PathogenBox_PlateA	E05	MMV688797	KINETOPLASTIDS		331.385	331.385	C18H22N3O2F			3.3262	CC1CCCCN1C(=O)NCCc2coc(n2)c3ccc(F)cc3	1.40476
45	PathogenBox_PlateA	E06	MMV688756	TUBERCULOSIS	Sutezolid	353.412	353.412	C16H20N3O3FS			0.9272	CC(=O)NC[C@H]1CN(C(=O)O1)c2ccc(N3CCSCC3)c(F)c2	1.07143
46	PathogenBox_PlateA	E07	MMV090930	TUBERCULOSIS		375.425	375.425	C16H13N3O4S2			2.8933	CCOC(=O)NC(=O)c1ccsc1NC(=O)c2nc3ccccc3s2	29.4524	91.5
47	PathogenBox_PlateA	E08	MMV676431	TUBERCULOSIS		317.767	317.767	C17H16NO3Cl			3.7535	Cc1ccc(NC(=O)CC2COc3ccccc3O2)cc1Cl	2.28571
48	PathogenBox_PlateA	E09	MMV676571	TUBERCULOSIS		433.432	433.432	C24H20N3O4F			4.3386	COc1ccc(cc1OC)c2onc(n2)c3cccc(NC(=O)Cc4ccc(F)cc4)c3	3.54762
49	PathogenBox_PlateA	E10	MMV676445	TUBERCULOSIS		281.352	281.352	C17H19N3O			2.7113	CCCn1c(CNc2ccccc2O)nc3ccccc13	0.809524
50	PathogenBox_PlateA	E11	MMV676589	TUBERCULOSIS		365.426	365.426	C21H23N3O3			4.31	O=C(CCC1CCCCC1)Nc2cccc(c2)c3oc(nn3)c4occc4	0.619048
51	PathogenBox_PlateA	F02	MMV026020	MALARIA		420.487	420.487	C23H20N2O4S			3.239	CS(=O)(=O)c1cccc(c1)c2cnc3[nH]cc(c4ccc(CCC(=O)O)cc4)c3c2	1.38095
52	PathogenBox_PlateA	F03	MMV688471	TOXOPLASMOSIS		343.379	343.379	C21H17N3O2			3.8866	CC(C(=O)Nc1ccc2oc(nc2c1)-c1ccncc1)c1ccccc1	1.58333
53	PathogenBox_PlateA	F04	MMV676388	TUBERCULOSIS		330.362	330.362	C15H14N4O3S			1.2165	COc1cccc(c1)n2nnnc2S(=O)(=O)Cc3ccccc3	0.952381
54	PathogenBox_PlateA	F05	MMV202553	KINETOPLASTIDS		269.304	269.304	C15H15N3O2			2.3157	CCC(=O)Nc1ccccc1C(=O)Nc2ccccn2	1.36905
55	PathogenBox_PlateA	F06	MMV688936	TUBERCULOSIS		386.855	386.855	C18H15N4O2ClS			3.7457	Clc1cccc2sc(nc12)N(CCCn3ccnc3)C(=O)c4occc4	1.4
56	PathogenBox_PlateA	F07	MMV676476	TUBERCULOSIS		380.434	380.434	C23H24O5			4.0281	CC1=C(CCC(=O)O)C(=O)Oc2c(C)c(OCc3cc(C)cc(C)c3)ccc12	2.66667
57	PathogenBox_PlateA	F08	MMV676377	TUBERCULOSIS		318.126	318.126	C13H8N3O2Br			2.5447	Brc1c(nc2ncccn12)c3ccc4OCOc4c3	2.9
58	PathogenBox_PlateA	F09	MMV676406	TUBERCULOSIS		475.606	475.606	C26H29N5O2S			3.0871	CC(C)n1ncc2c(cc(nc12)c3ccccc3)C(=O)NCC(N4CCOCC4)c5cccs5	2.6
59	PathogenBox_PlateA	F10	MMV676461	TUBERCULOSIS		357.427	357.427	C18H19N3O3S			4.4718	CCOC(=O)c1cc(on1)c2csc(Nc3c(C)cc(C)cc3C)n2	2.43333
60	PathogenBox_PlateA	F11	MMV676509	TUBERCULOSIS		376.836	376.836	C22H17N2O2Cl			5.4099	Cc1ccc2oc(nc2c1)c3cc(NC(=O)Cc4ccccc4)ccc3Cl	3.4
61	PathogenBox_PlateA	G02	MMV688470	TOXOPLASMOSIS		464.583	464.583	C24H28N6O2S			3.1154	CS(=O)(=O)N1CCC(CCn2nc(Cc3cccc4ccccc34)c3c(N)ncnc23)CC1	0.75
62	PathogenBox_PlateA	G03	MMV688704	TOXOPLASMOSIS		391.294	391.294	C19H20N4OCl2			4.7676	Cc1cc2nc(NC(=O)C(C)(C)C)nc(Cl)c2n1Cc1ccc(Cl)cc1	1.16667
63	PathogenBox_PlateA	G04	MMV188296	KINETOPLASTIDS		312.344	312.344	C18H17N2O2F			2.2949	CNC(=O)C1Cc2ccccc2N1C(=O)Cc3ccc(F)cc3	1.88889
64	PathogenBox_PlateA	G05	MMV688958	KINETOPLASTIDS		308.397	308.397	C18H16N2OS			3.6557	O=C(NCCc1csc(n1)c2ccccc2)c3ccccc3	2.83333
65	PathogenBox_PlateA	G06	MMV063404	TUBERCULOSIS		345.874	345.874	C19H24N3OCl			3.5172	Cc1nn(Cc2ccccc2)c(Cl)c1C(=O)NC3CCCCCC3	2.22222
66	PathogenBox_PlateA	G07	MMV676558	TUBERCULOSIS		371.455	371.455	C22H17N3OS			5.5246	CC1=NN(C(=O)C1Cc2cccc3ccccc23)c4nc5ccccc5s4	3.75
67	PathogenBox_PlateA	G08	MMV688555	TUBERCULOSIS		339.84	339.84	C15H18N3O2ClS			2.4307	Clc1ccc(CN2CCN(CC2)C(=O)NCc3occc3)s1	0.217949
68	PathogenBox_PlateA	G09	MMV676597	TUBERCULOSIS		343.423	343.423	C18H25N5O2			3.7724	CCCn1nnc(NC(=O)COc2ccc(cc2)C3CCCCC3)n1	0.551282
69	PathogenBox_PlateA	G10	MMV676588	TUBERCULOSIS		258.382	258.382	C15H18N2S			3.4666	Nc1c2CCCCc2nc3sc4CCCCc4c13	0.448718
70	PathogenBox_PlateA	G11	MMV676554	TUBERCULOSIS		335.357	335.357	C19H17N3O3			3.2723	COc1ccc(Nc2ccccc2NC(=O)c3ccc(O)nc3)cc1	1.76923
71	PathogenBox_PlateA	H02	MMV688350	DENGUE		465.497	465.497	C24H20N3O4FS			3.0515	COC(=O)c1ccc(F)cc1NS(=O)(=O)c2cccc(c2)c3cnn(Cc4ccccc4)c3	1.53846
72	PathogenBox_PlateA	H03	MMV688360	KINETOPLASTIDS		421.532	421.532	C25H31N3O3			3.919	COc1ccc(cc1OCc2ccccn2)C3=NN(C4CCCCCC4)C(=O)C3(C)C	1.53846
73	PathogenBox_PlateA	H04	MMV099637	KINETOPLASTIDS		297.333	297.333	C17H16N3OF			2.9367	Cc1nn2c(O)c3CCCCc3nc2c1c4ccc(F)cc4	3.29167
74	PathogenBox_PlateA	H05	MMV688798	KINETOPLASTIDS		365.445	365.445	C21H19NO3S			3.4766	CS(=O)(=O)c1ccccc1C(=O)N(Cc2ccccc2)c3ccccc3	5.20833	1.3
75	PathogenBox_PlateA	H06	MMV676539	TUBERCULOSIS		332.353	332.353	C20H16N2O3			2.5026	O=C(NCCc1c[nH]c2ccccc12)C3=Cc4ccccc4OC3=O	6.20833	6.36667
76	PathogenBox_PlateA	H07	MMV202458	TUBERCULOSIS		319.788	319.788	C17H18NO3Cl			3.6212	COc1ccc(OC(C)C(=O)Nc2ccc(Cl)cc2C)cc1	5.54167	6.3
77	PathogenBox_PlateA	H08	MMV676474	TUBERCULOSIS		336.427	336.427	C21H24N2O2			4.5058	COc1ccccc1OCCCCn2c(nc3ccccc23)C4CC4	6.04167	6.2
78	PathogenBox_PlateA	H09	MMV461553	TUBERCULOSIS		419.368	419.368	C18H14NO3F5S			4.7791	COC(=O)c1c2CCCCCc2sc1NC(=O)c3c(F)c(F)c(F)c(F)c3F	2.625
79	PathogenBox_PlateA	H10	MMV676520	TUBERCULOSIS		364.394	364.394	C21H20N2O4			3.4784	O=C(N1CCN(Cc2ccc3OCOc3c2)CC1)c4oc5ccccc5c4	1.06061
80	PathogenBox_PlateA	H11	MMV676512	TUBERCULOSIS		347.394	347.394	C18H13N5OS			2.9493	O=C(Nc1nc(cs1)c2ccccn2)c3cncn3c4ccccc4	0.560606
81	PathogenBox_PlateB	A02	MMV676480	ONCHOCERCIASIS		474.528	474.528	C26H22N2O5S			3.4297	COC(=O)c1c2CCN(Cc3ccccc3)Cc2sc1NC(=O)C4=Cc5ccccc5OC4=O	1.25
82	PathogenBox_PlateB	A03	MMV652003	KINETOPLASTIDS		321.062	321.062	C15H11NO3BF3			2.6184	OB1OCc2ccc(NC(=O)c3ccccc3C(F)(F)F)cc12	0.444444
83	PathogenBox_PlateB	A04	MMV000062	REFERENCE COMPOUNDS	Pentamidine	592.687	340.427	C19H24N4O2	Isethionic Acid	2	1.7544	NC(=N)c1ccc(OCCCCCOc2ccc(cc2)C(=N)N)cc1	0.305556
84	PathogenBox_PlateB	A05	MMV006372	MALARIA		269.35	269.35	C15H19N5			1.6173	CN(C)CCNc1ncnc2c3cc(C)ccc3[nH]c12	0.333333
85	PathogenBox_PlateB	A06	MMV688854	CRYPTOSPORIDIOSIS		452.979	416.519	C24H28N6O	Hydrochloride	1	3.259	CCOc1ccc2cc(ccc2c1)c3nn(CC4CCN(C)CC4)c5ncnc(N)c35	1.16667
86	PathogenBox_PlateB	A07	MMV011903	MALARIA		374.404	374.404	C20H18N6O2			2.8797	Cc1ccc(NC(=O)c2nc[nH]c2C(=O)Nc3nc4ccccc4[nH]3)c(C)c1	1.36111
87	PathogenBox_PlateB	A08	MMV020591	MALARIA		385.467	385.467	C24H23N3O2			3.9509	CC(C)C(NC(=O)Cc1cccc2ccccc12)C(=O)Nc3cccc(c3)C#N	0.25
88	PathogenBox_PlateB	A09	MMV020623	MALARIA		414.509	414.509	C25H26N4O2			4.544	Cc1onc(C)c1C(=O)N2CCCC(C2)c3[nH]c4c(C)cccc4c3c5ccncc5	2.5
89	PathogenBox_PlateB	A10	MMV020512	MALARIA		415.493	415.493	C25H25N3O3			3.7633	Cc1ccc(Oc2ccc(NC(=O)CNc3ccccc3N4CCCC4=O)cc2)cc1	3.41667
90	PathogenBox_PlateB	A11	MMV688761	SCHISTOSOMIASIS		461.511	461.511	C20H19N3O6S2			2.2391	CS(=O)(=O)c1ccc(cc1[N+](=O)[O-])C(=O)N(CC2CCCO2)c3nc4ccccc4s3	0.583333
91	PathogenBox_PlateB	B02	MMV012074	TUBERCULOSIS		299.761	299.761	C16H14N3OCl			2.5169	Cc1nc2ccccn2c1C(=O)NCc3ccc(Cl)cc3	1
92	PathogenBox_PlateB	B03	MMV676604	KINETOPLASTIDS		371.457	371.457	C18H21N5O2S			2.1093	CC(C)n1c(C)ncc1c2ccnc(Nc3ccc(cc3)S(=O)(=O)C)n2	4.25
93	PathogenBox_PlateB	B04	MMV002529	REFERENCE COMPOUNDS	Praziquantel	312.413	312.413	C19H24N2O2			2.5396	O=C(C1CCCCC1)N2CC3N(CCc4ccccc34)C(=O)C2	0.166667
94	PathogenBox_PlateB	B05	MMV687776	LYMPHATIC FILARIASIS		609.204	609.204	C28H23N2O4BCl2F4			7.7063	Cc1cc(ccc1C(=O)NCc2ccc3B(O)OC(C)(C)c3c2)C4=NOC(C4)(c5cc(Cl)c(F)c(Cl)c5)C(F)(F)F	1.63889
95	PathogenBox_PlateB	B06	MMV687800	REFERENCE COMPOUNDS	Clofazimine	473.396	473.396	C27H22N4Cl2			6.2781	CC(C)N=C1C=C2N(c3ccc(Cl)cc3)c4ccccc4N=C2C=C1Nc5ccc(Cl)cc5	0.583333
96	PathogenBox_PlateB	B07	MMV020982	MALARIA		374.444	374.444	C22H22N4O2			3.5347	CC(C)(C)c1cc(cc(c1)C(=O)Nc2cccnc2)C(=O)Nc3cccnc3	1.25
97	PathogenBox_PlateB	B08	MMV020120	MALARIA		354.538	354.538	C23H34N2O			3.7406	CC1CC1C(=O)NC2CCN(CC3(CCCCC3)c4ccccc4)CC2	1.13889
98	PathogenBox_PlateB	B09	MMV676605	MALARIA		421.494	421.494	C26H23N5O			4.0356	C[C@@]1(O)C[C@@H](C1)c2nc(c3ccc4ccc(nc4c3)c5ccccc5)c6c(N)nccn26	0.944444
99	PathogenBox_PlateB	B10	MMV007638	MALARIA		416.518	416.518	C20H20N2O4S2			3.6826	CCOc1ccc(cc1)c2nc(NC(=O)CS(=O)(=O)c3ccccc3)sc2C	0.254386
100	PathogenBox_PlateB	B11	MMV021057	MALARIA	Azoxystrobin	403.394	403.394	C22H17N3O5			2.9412	CO\C=C(\C(=O)OC)/c1ccccc1Oc2cc(Oc3ccccc3C#N)ncn2	0.605263
101	PathogenBox_PlateB	C02	MMV690027	KINETOPLASTIDS		584.708	584.708	C33H40N6O4			5.4432	COC1=C(OCCCCOC2=CC=C(C3=NNN=N3)C=C2)C=C(C([C@@H]4[C@H]5CC=CC4)=NN(C6CCCCCC6)C5=O)C=C1	0.947368
102	PathogenBox_PlateB	C03	MMV676600	KINETOPLASTIDS		474.555	474.555	C26H30N6O3			0.7341	CO[C@@H](C(=O)N1Cc2[nH]nc(NC(=O)c3ccc(cc3)N4CCN(C)CC4)c2C1)c5ccccc5	0.578947
103	PathogenBox_PlateB	C04	MMV676382	SCHISTOSOMIASIS		377.443	377.443	C20H23N7O			1.683	Cn1ncc2c(nc(NCCc3c[nH]c4ccccc34)nc12)N1CCOCC1	0.692982
104	PathogenBox_PlateB	C05	MMV001625	REFERENCE COMPOUNDS	alpha-Difluoromethylornithine	236.6	182.17	C6H12N2O2F2	Hydrochloride hydrate	1	-4.9852	NCCCC(N)(C(F)F)C(=O)O	0.315789
105	PathogenBox_PlateB	C06	MMV001493	ONCHOCERCIASIS	Isradipine	371.387	371.387	C19H21N3O5			3.192	COC(=O)C1=C(C)NC(=C(C1c2cccc3nonc23)C(=O)OC(C)C)C	1.125
106	PathogenBox_PlateB	C07	MMV020136	MALARIA		366.462	366.462	C15H18N4O3S2			0.9629	CNC(=O)c1cc(cs1)S(=O)(=O)N2CCN(CC2)c3ccccn3	0.5
107	PathogenBox_PlateB	C08	MMV020710	MALARIA		399.838	399.838	C19H18N5O3Cl			1.9842	COc1ccc(Cl)cc1NC(=O)CN(C)C(=O)c2cnn(n2)c3ccccc3	1.75
108	PathogenBox_PlateB	C09	MMV020517	MALARIA		364.449	364.449	C21H24N4O2			3.0159	COc1ccccc1CNC(=O)c2cc(nc3c2cnn3C(C)C)C4CC4	2.25
109	PathogenBox_PlateB	C10	MMV019721	MALARIA		437.968	437.968	C19H20N3O3ClS2			3.7954	CCN(CC)S(=O)(=O)c1ccc(Cl)c(c1)C(=O)Nc2ccc3nc(C)sc3c2	1.33333
110	PathogenBox_PlateB	C11	MMV688763	SCHISTOSOMIASIS		351.834	351.834	C13H10N5OClS2			2.875	CNc1nnc(SC2=C(Cl)C(=O)N(N=C2)c3ccccc3)s1	4.70833
111	PathogenBox_PlateB	D02	MMV020537	MALARIA		334.825	334.825	C16H15N2O2ClS			3.8936	Clc1ccc2OCCN(c3ccc(s3)C(=O)NC4CC4)c2c1	1.88095
112	PathogenBox_PlateB	D03	MMV637953	REFERENCE COMPOUNDS	Suramin	1435.28	1297.28	C51H40N6O23S6	Sodium	6	-2.9082	Cc1ccc(cc1NC(=O)c2cccc(NC(=O)Nc3cccc(c3)C(=O)Nc4cc(ccc4C)C(=O)Nc5ccc(c6cc(cc(c56)S(=O)(=O)O)S(=O)(=O)O)S(=O)(=O)O)c2)C(=O)Nc7ccc(c8cc(cc(c78)S(=O)(=O)O)S(=O)(=O)O)S(=O)(=O)O	0.666667
113	PathogenBox_PlateB	D04	MMV676536	SCHISTOSOMIASIS		373.492	373.492	C18H19N3O2S2			3.0459	COCC(C)NC(=O)CSc1ncnc2sc(cc12)-c1ccccc1	1.90476
114	PathogenBox_PlateB	D05	MMV000063	REFERENCE COMPOUNDS	Sitamaquine	515.71	343.515	C21H33N3O	Tosic Acid	1	4.2265	CCN(CC)CCCCCCNc1cc(OC)cc2c(C)ccnc12	2.19048
115	PathogenBox_PlateB	D06	MMV689255	CRYPTOSPORIDIOSIS	D-Eritadenine	253.215	253.215	C9H11N5O4			-2.5397	Nc1ncnc2c1ncn2C[C@@H](O)[C@@H](O)C(=O)O	2.47619
116	PathogenBox_PlateB	D07	MMV019838	MALARIA		412.293	412.293	C18H10N4OF6			3.934	FC(F)(F)c1cc(cc(c1)C(F)(F)F)C(=O)Nc2ccnc(n2)c3cccnc3	2.7619
117	PathogenBox_PlateB	D08	MMV020520	MALARIA		417.509	417.509	C25H27N3O3			3.4132	Cc1cc2ccccc2n1CC(=O)N3CC(Oc4ccccc34)C(=O)N5CCCCC5	2.02381
118	PathogenBox_PlateB	D09	MMV019234	MALARIA		382.438	382.438	C20H18N2O4S			3.5875	COc1ccc(cc1OC)C2CC(=NN2C(=O)c3occc3)c4cccs4	2.11905
119	PathogenBox_PlateB	D10	MMV016136	MALARIA		349.825	349.825	C19H16N5Cl			3.5042	Cc1cc(Nc2ccncc2)n3nc(C)c(c4ccccc4Cl)c3n1	1.66667
120	PathogenBox_PlateB	D11	MMV688762	SCHISTOSOMIASIS		353.46	353.46	C24H23N3			4.632	C1CCN(C1)C(c2ccccn2)c3c([nH]c4ccccc34)c5ccccc5	0.916667
121	PathogenBox_PlateB	E02	MMV676386	TUBERCULOSIS		335.357	335.357	C19H17N3O3			3.0336	Cc1cccc(Cn2ccc(NC(=O)c3ccc4OCOc4c3)n2)c1	2.91667
122	PathogenBox_PlateB	E03	MMV688773	REFERENCE COMPOUNDS	Benznidazole	260.249	260.249	C12H12N4O3			-0.248	[O-][N+](=O)c1nccn1CC(=O)NCc2ccccc2	2.91667
123	PathogenBox_PlateB	E04	MMV000011	REFERENCE COMPOUNDS	Doxycycline	480.9	444.44	C22H24N2O8	Hydrochloride	1	-1.1715	C[C@@H]1[C@H]2[C@H](O)[C@H]3[C@H](N(C)C)C(=C(C(=O)N)C(=O)[C@@]3(O)C(=C2C(=O)c4c(O)cccc14)O)O	5.83333	6.5
124	PathogenBox_PlateB	E05	MMV687775	LYMPHATIC FILARIASIS		462.03	462.03	C19H14NO3BCl2F4			6.5055	CC1(C)OB(O)c2ccc(cc12)C3=NOC(C3)(c4cc(Cl)c(F)c(Cl)c4)C(F)(F)F	6.58333	3.9
125	PathogenBox_PlateB	E06	MMV002817	ONCHOCERCIASIS	Iodoquinol	396.953	396.953	C9H5NOI2			2.5041	Oc1c(I)cc(I)c2cccnc12	0.151515
126	PathogenBox_PlateB	E07	MMV676442	MALARIA		415.531	415.531	C25H29N5O			3.8179	CC(C)c1ncc(c2ccncc2)c(n1)[C@@H]3CC[C@@H](CNC(=O)c4cccnc4)CC3	0.833333
127	PathogenBox_PlateB	E08	MMV020152	MALARIA		278.311	278.311	C17H14N2O2			3.3285	Cc1onc(c1)C(=O)Nc2ccc(cc2)c3ccccc3	0.742424
128	PathogenBox_PlateB	E09	MMV024397	MALARIA		335.451	335.451	C21H25N3O			3.5228	O=C(NC1CC1)c2ccc(nc2)N3CCC(Cc4ccccc4)CC3	0.787879
129	PathogenBox_PlateB	E10	MMV019807	MALARIA		323.783	323.783	C18H14N3OCl			3.1531	Cc1ccc2cc(C3NC(=O)c4ccccc4N3)c(Cl)nc2c1	0.712121
130	PathogenBox_PlateB	E11	MMV560185	MALARIA		289.382	289.382	C19H19N3			3.6489	C1CCN(CC1)c2cc(nc3ccccc23)c4ccccn4	0.727273
131	PathogenBox_PlateB	F02	MMV019189	MALARIA		309.391	309.391	C17H15N3OS			3.8835	Cc1ccc2c(NC(=O)C23NN=C(S3)c4ccccc4)c1C	1.4
132	PathogenBox_PlateB	F03	MMV688774	REFERENCE COMPOUNDS	Posaconazole	700.777	700.777	C37H42N8O4F2			4.2308	CC[C@@H]([C@H](C)O)N1N=CN(C1=O)c2ccc(cc2)N3CCN(CC3)c4ccc(OC[C@@H]5CO[C@](Cn6cncn6)(C5)c7ccc(F)cc7F)cc4	3.43333
133	PathogenBox_PlateB	F04	MMV003270	HOOKWORM	Zoxazolamine	168.583	168.583	C7H5N2OCl			1.9696	ClC1=CC(N=C(N)O2)=C2C=C1	6.86667	4.5
134	PathogenBox_PlateB	F05	MMV637229	TRICHURIASIS	Clemastine	459.968	343.898	C21H26NOCl	Fumaric Acid	1	4.5988	ClC1=CC=C([C@@](C)(C2=CC=CC=C2)OCCC3N(C)CCC3)C=C1	3.23333
135	PathogenBox_PlateB	F06	MMV688853	CRYPTOSPORIDIOSIS		389.878	353.418	C19H23N5O2	Hydrochloride	1	1.7526	CCOc1ccc2cc(cnc2c1)c3nn(c(N)c3C(=O)N)C(C)(C)C	3.83333
136	PathogenBox_PlateB	F07	MMV020321	MALARIA		386.801	386.801	C18H18N2O2ClF3			3.4794	COc1ccccc1C(C)NCC(=O)Nc2cc(ccc2Cl)C(F)(F)F	5.5	1.9
137	PathogenBox_PlateB	F08	MMV019087	MALARIA		420.395	420.395	C19H19N6O2F3			1.6094	Cc1cc(C)n2nc(nc2n1)C(=O)Nc3cc(ccc3N4CCOCC4)C(F)(F)F	1.2
138	PathogenBox_PlateB	F09	MMV676528	MALARIA		433.884	433.884	C20H17N3O3ClFS			3.4666	CN(c1ccc(F)cc1)S(=O)(=O)c2ccc(Cl)c(c2)C(=O)Nc3cccc(C)n3	1.11667
139	PathogenBox_PlateB	F10	MMV020320	MALARIA		359.389	359.389	C20H17N5O2			2.855	Cc1oc(NC(=O)c2cn(nc2c3ccccc3C)c4ccccc4)nn1	0.616667
140	PathogenBox_PlateB	F11	MMV085210	MALARIA		445.969	445.969	C22H24N3O3ClS			3.7148	Clc1ccc(cc1)S(=O)(=O)NC(Cc2c[nH]c3ccccc23)C(=O)N4CCCCC4	2.91667
141	PathogenBox_PlateB	G02	MMV069458	TUBERCULOSIS		222.557	222.557	C6H2N4ClF3			0.6132	FC(F)(F)c1nnc2ccc(Cl)nn12	2.38333
142	PathogenBox_PlateB	G03	MMV688991	REFERENCE COMPOUNDS	Nitazoxanide	307.282	307.282	C12H9N3O5S			1.6871	CC(=O)Oc1ccccc1C(=O)Nc2ncc(s2)[N+](=O)[O-]	8.26667	20
143	PathogenBox_PlateB	G04	MMV687801	REFERENCE COMPOUNDS	Ethambutol	277.23	204.31	C10H24N2O2	Hydrochloride	2	-0.3822	CC[C@H](CO)NCCN[C@H](CC)CO	1.52778
144	PathogenBox_PlateB	G05	MMV689480	REFERENCE COMPOUNDS	Buparvaquone	326.429	326.429	C21H26O3			4.6861	O=C1C(CC2CCC(C(C)(C)C)CC2)=C(C(C3=C1C=CC=C3)=O)O	2.33333
145	PathogenBox_PlateB	G06	MMV003152	REFERENCE COMPOUNDS	Mebendazole	295.298	295.298	C16H13N3O3			2.6656	COC(=O)Nc1nc2cc(ccc2[nH]1)C(=O)c3ccccc3	1.94444
146	PathogenBox_PlateB	G07	MMV006239	MALARIA		368.239	368.239	C18H14N3OBr			2.4326	Brc1ccc2NC(=O)C3(NCCc4c3[nH]c5ccccc45)c2c1	2
147	PathogenBox_PlateB	G08	MMV000858	MALARIA		399.919	399.919	C16H18N3O3ClS2			2.207	Clc1ccc(cc1)S(=O)(=O)N2CCN(CC2)C(=S)NCc3occc3	2.19444
148	PathogenBox_PlateB	G09	MMV006741	MALARIA		378.476	378.476	C22H26N4O2			3.1909	COc1cc2ncnc(NC3CCN(Cc4ccccc4)CC3)c2cc1OC	4.25
149	PathogenBox_PlateB	G10	MMV688768	SCHISTOSOMIASIS		325.471	325.471	C19H23N3S			3.3806	CN1CCN(CC1)C(c2cccs2)c3c(C)[nH]c4ccccc34	2.1
150	PathogenBox_PlateB	G11	MMV000023	REFERENCE COMPOUNDS	Primaquine	455.353	259.353	C15H21N3O	Phosphoric Acid	2	1.9025	COc1cc(NC(C)CCCN)c2ncccc2c1	10	21.6
151	PathogenBox_PlateB	H02	MMV676602	KINETOPLASTIDS		460.575	460.575	C25H32N8O			2.0948	CNC(=O)c1nn(C)c2c3nc(Nc4ccc(cc4)N5CCN(C)CC5)ncc3CC(C)(C)c12	9.55	13.6
152	PathogenBox_PlateB	H03	MMV000016	REFERENCE COMPOUNDS	Mefloquine	414.776	378.316	C17H16N2OF6	Hydrochloride	1	3.5076	O[C@H]([C@H]1CCCCN1)c2cc(nc3c(cccc23)C(F)(F)F)C(F)(F)F	1.8
153	PathogenBox_PlateB	H04	MMV687803	REFERENCE COMPOUNDS	Linezolid	337.346	337.346	C16H20N3O4F			0.5203	CC(=O)NC[C@@H]1CN(C(=O)O1)c2ccc(N3CCOCC3)c(F)c2	1.95
154	PathogenBox_PlateB	H05	MMV668727	ONCHOCERCIASIS		384.283	384.283	C17H10N4F6			3.454	Nc1ncc(cc1c2ccc(nc2)C(F)(F)F)c3ccc(nc3)C(F)(F)F	2.05
155	PathogenBox_PlateB	H06	MMV019742	MALARIA		410.496	410.496	C21H22N4O3S			2.354	Cc1ccc(cc1)S(=O)(=O)N2CCN(CC2)C(=O)c3cc([nH]n3)c4ccccc4	0.285714
156	PathogenBox_PlateB	H07	MMV009054	MALARIA		351.193	351.193	C15H12N4O2Cl2			2.3011	Cc1onc(c1)C(=O)Nc2cnn(Cc3ccc(Cl)cc3Cl)c2	0.178571
157	PathogenBox_PlateB	H08	MMV006901	MALARIA		306.369	306.369	C18H18N4O			3.3648	CN(C)c1cc(NC(=O)Nc2ccccc2)c3ccccc3n1	1.17857
158	PathogenBox_PlateB	H09	MMV020391	MALARIA		394.921	394.921	C19H23N2O3ClS			3.73	CC(C)C(C(=O)Nc1ccc(cc1)S(=O)(=O)N(C)C)c2ccc(Cl)cc2	0.25
159	PathogenBox_PlateB	H10	MMV676380	MALARIA		370.79	370.79	C18H15N4O3Cl			2.4689	CC(=O)Nc1ccc(NC(=O)c2cc([nH]n2)c3cc(Cl)ccc3O)cc1	1.25
160	PathogenBox_PlateB	H11	MMV688994	REFERENCE COMPOUNDS	Streptomycin	725.499	581.574	C21H39N7O12	Sulfate	1.5	-8.2075	CNC1C(O)C(O)C(CO)OC1OC2C(OC3C(O)C(O)C(NC(=N)N)C(O)C3NC(=N)N)OC(C)C2(O)C=O	0.559524
161	PathogenBox_PlateC	A02	MMV675997	KINETOPLASTIDS		424.511	424.511	C24H29N4O2F			3.4773	Fc1ccc(cc1)N2CCN(CCCCN(CC#N)C(=O)OCc3ccccc3)CC2	0.322222
162	PathogenBox_PlateC	A03	MMV676204	ONCHOCERCIASIS		334.387	334.387	C21H19N2OF			4.2993	Fc1ccc(cc1)C(=O)N(CCNc2ccccc2)c3ccccc3	0.644444
163	PathogenBox_PlateC	A04	MMV687239	TUBERCULOSIS		341.355	341.355	C19H17N3OF2			2.8356	CC(C)(C(=O)Nc1ccc(F)cc1)n2cc(cn2)c3ccccc3F	0.466667
164	PathogenBox_PlateC	A05	MMV688122	TUBERCULOSIS		320.372	320.372	C16H12N6S			2.8589	Cc1cccc(n1)c2nc(Nc3ccncn3)c4sccc4n2	1.27778
165	PathogenBox_PlateC	A06	MMV688852	TOXOPLASMOSIS		333.791	333.791	C16H17N5ClF			2.8761	CC(C)(C)n1nc(Cc2ccc(F)c(Cl)c2)c2c(N)ncnc12	0.733333
166	PathogenBox_PlateC	A07	MMV687145	TUBERCULOSIS		267.347	267.347	C12H17N3O2S			1.4933	CCCCS(=O)(=O)Nc1ccc2cnn(C)c2c1	1.36667
167	PathogenBox_PlateC	A08	MMV688327	TUBERCULOSIS	Radezolid	474.915	438.455	C22H23N6O3F	Hydrochloride	1	0.8782	CC(=O)NCC1CN(C(=O)O1)c2ccc(c(F)c2)c3ccc(CNCc4cn[nH]n4)cc3	0.344444
168	PathogenBox_PlateC	A09	MMV008439	MALARIA		384.52	384.52	C23H32N2O3			2.3927	COc1ccc(CN2CCOc3ccc(cc3C2)C(C)(O)CN(C)C)cc1C	0.222222
169	PathogenBox_PlateC	A10	MMV595321	KINETOPLASTIDS		458.541	458.541	C21H26N6O4S			2.376	CC1=C(C)C(NC(N2N=C(C)C=C2NC(C3=CC=C(S(=O)(N(CC)CC)=O)C=C3)=O)=N1)=O	0.166667
170	PathogenBox_PlateC	A11	MMV687747	TUBERCULOSIS		385.254	385.254	C19H17N2O2Br			3.5305	Cc1cc(OCC(=O)NCc2ccccc2)c3cc(Br)ccc3n1	0.855556
171	PathogenBox_PlateC	B02	MMV020388	MALARIA		365.905	365.905	C19H28N3O2Cl			2.6934	CC(Nc1cc(Cl)ccc1N2CCOCC2)C(=O)N3CCCC(C)C3	0.555556
172	PathogenBox_PlateC	B03	MMV688547	KINETOPLASTIDS		613.469	387.438	C21H21N7O	Trifluoroacetate	2	0.896	COc1ccc(cc1c2cn(nn2)c3cccc(c3)C4=NCCN4)C5=NCCN5	0.911111
173	PathogenBox_PlateC	B04	MMV688466	TUBERCULOSIS		502.003	465.543	C24H24N5O2FS	Hydrochloride	1	2.4271	Cn1ccnc1CNCCS(=O)(=O)c2cccc(Nc3ccc(cn3)c4cccc(F)c4)c2	0
174	PathogenBox_PlateC	B05	MMV687749	TUBERCULOSIS		448.947	412.487	C24H24N6O	Hydrochloride	1	3.1276	C([C@@H]1CN(CCN1)c2nccc(Oc3ccc(cc3)n4ccnc4)n2)c5ccccc5	0.0357143
175	PathogenBox_PlateC	B06	MMV688846	TUBERCULOSIS		383.835	383.835	C20H21NOClF3			4.9457	Cc1ccccc1CN2CCC(O)(CC2)c3ccc(Cl)c(c3)C(F)(F)F	0.25
176	PathogenBox_PlateC	B07	MMV054312	TUBERCULOSIS		240.306	240.306	C15H16N2O			2.8079	CC(=O)N1CCc2cc3nc(C)cc(C)c3cc12	0.107143
177	PathogenBox_PlateC	B08	MMV689060	KINETOPLASTIDS		313.226	313.226	C14H18N4Cl2			2.2856	Clc1ccc(CN2CCN(CC2)C3=NCCN3)cc1Cl	0.464286
178	PathogenBox_PlateC	B09	MMV689061	KINETOPLASTIDS		422.495	422.495	C24H27N4O2F			4.0942	CC1=C(F)C=CC=C1CN2CCCC(CC3=NC(C4=CC=C(NC(C)=O)C=C4)=NO3)C2	0.869048
179	PathogenBox_PlateC	B10	MMV689028	KINETOPLASTIDS		474.575	474.575	C26H26N4O3S			3.34	O=C(N1CCN(CC2=CC=C(NS(=O)(C3=CC=C(C)C=C3)=O)C=C2)CC1)C4=CC(C#N)=CC=C4	-0.5
180	PathogenBox_PlateC	B11	MMV688371	KINETOPLASTIDS		449.757	449.757	C22H19N2O2Cl3			5.3044	NCCN(C(=O)c1ccc(Cl)cc1Cl)c2ccc(OCc3ccc(Cl)cc3)cc2	1.7037
181	PathogenBox_PlateC	C02	MMV688508	TUBERCULOSIS		358.364	358.364	C19H19N2O4F			1.9132	CC(=O)NCC1CN(C(=O)O1)c2ccc(c(F)c2)c3ccc(CO)cc3	0.777778
182	PathogenBox_PlateC	C03	MMV688283	KINETOPLASTIDS		494.996	494.996	C24H23N6O2ClS			3.7297	CN1CCN(CC1)S(=O)(=O)c2ccc(cc2)c3ccc4c(Nc5ncc(Cl)cn5)ccnc4c3	1.75926
183	PathogenBox_PlateC	C04	MMV687243	TUBERCULOSIS		336.181	336.181	C15H14NO3Br			2.8271	NC(=O)c1cc(Br)ccc1OCCOc2ccccc2	0.388889
184	PathogenBox_PlateC	C05	MMV687730	TUBERCULOSIS		384.515	384.515	C22H32N4O2			4.9985	CCCCOC(=O)Nc1cc2nc([nH]c2cc1N3CCCC3)C4CCCCC4	1.31481
185	PathogenBox_PlateC	C06	MMV687251	TUBERCULOSIS		275.305	275.305	C8H9N3O4S2			-0.043	CN1C(=O)N(C)c2nsc(c2C1=O)S(=O)(=O)C	0.0729167
186	PathogenBox_PlateC	C07	MMV687254	TUBERCULOSIS		305.374	305.374	C19H19N3O			4.0734	CCCCc1ccc(nc1)C(=O)Nc2nccc3ccccc23	0.0729167
187	PathogenBox_PlateC	C08	MMV688509	TOXOPLASMOSIS		455.523	455.523	C28H26N3O2F			5.7056	Fc1ccc(cc1)-c1[nH]c(cc1-c1ccncc1)C1CCN(CC1)C(=O)OCc1ccccc1	0.0833333
188	PathogenBox_PlateC	C09	MMV688361	KINETOPLASTIDS		357.408	357.408	C21H19N5O			2.3121	C1CN=C(N1)c2ccc(cc2)c3cc(on3)c4cccc(c4)C5=NCCN5	0.270833
189	PathogenBox_PlateC	C10	MMV689029	KINETOPLASTIDS		490.574	490.574	C26H26N4O4S			2.9261	O=C(N1CCN(CC2=CC=C(NS(=O)(C3=CC=C(OC)C=C3)=O)C=C2)CC1)C4=CC(C#N)=CC=C4	0.15625
190	PathogenBox_PlateC	C11	MMV022236	MALARIA		439.482	439.482	C21H28N5O2F3			3.0775	CCN(CC)CCCN1CCN(CC1)C(=O)c2cccc(c2)c3noc(n3)C(F)(F)F	0.541667
191	PathogenBox_PlateC	D02	MMV688410	KINETOPLASTIDS		384.902	384.902	C21H25N4OCl			2.3892	CN(C)CC(=O)NCCN1C(c2ccccc2)c3cc(Cl)ccc3N=C1C	0.488095
192	PathogenBox_PlateC	D03	MMV676048	KINETOPLASTIDS		325.233	325.233	C16H18N2OCl2			4.0023	Clc1ccc(Cl)c(CO[C@H]2CCCC[C@@H]2n3ccnc3)c1	1.05952
193	PathogenBox_PlateC	D04	MMV687703	TUBERCULOSIS		377.483	377.483	C22H27N5O			2.9035	COc1cccc(n1)c2nc3c(cccc3n2CC4CCCN4)N5CCCC5	1.2619
194	PathogenBox_PlateC	D05	MMV687248	TUBERCULOSIS		320.32	320.32	C18H13N4OF			3.1061	Nc1nc2ccc(cc2[nH]1)c3cncc(Oc4ccc(F)cc4)c3	0.202381
195	PathogenBox_PlateC	D06	MMV688125	TUBERCULOSIS		427.603	427.603	C24H33N3O2S			3.5983	CCCc1ccc(cc1)S(=O)(=O)Nc2ccc(CN3CCN(CC4CC4)CC3)cc2	0.630952
196	PathogenBox_PlateC	D07	MMV687188	TUBERCULOSIS		352.384	352.384	C20H20N2O4			2.9559	COc1ccc2nc(C)cc(OCC(=O)Nc3ccccc3OC)c2c1	1.69048
197	PathogenBox_PlateC	D08	MMV690103	KINETOPLASTIDS		349.43	349.43	C19H23N7			2.6268	C[C@@H](N(C)c1ncc2c(N)nc(N)nc2n1)c3ccc4CCCCc4c3	1.5
198	PathogenBox_PlateC	D09	MMV688124	TUBERCULOSIS		443.645	443.645	C25H37N3O2S			4.2968	CCc1ccc(cc1)S(=O)(=O)Nc2cc(CN3CCN(CCC(C)C)CC3)ccc2C	0.85
199	PathogenBox_PlateC	D10	MMV688845	TUBERCULOSIS		435.539	435.539	C24H25N3O3S			3.2276	O=C(Nc1ccccc1N2CCOCC2)[C@@H](Cc3ccccc3)NC(=O)c4cccs4	1.55
200	PathogenBox_PlateC	D11	MMV1030799	MALARIA		330.391	330.391	C20H18N4O			3.9894	CCCn1c(NC(=O)c2ccc3ccccc3n2)nc4ccccc14	0.9
201	PathogenBox_PlateC	E02	MMV675994	CRYPTOSPORIDIOSIS		336.775	336.775	C18H13N4OCl			2.7981	Clc1ccc(cc1)n2cc(COc3ccnc4ccccc34)nn2	3.3
202	PathogenBox_PlateC	E03	MMV676057	KINETOPLASTIDS		420.504	420.504	C24H28N4O3			4.2349	CC(C)(C)OC(=O)N1CCN(CC1)c2cc(n[nH]2)c3ccc(Oc4ccccc4)cc3	1.15
203	PathogenBox_PlateC	E04	MMV687699	TUBERCULOSIS		388.171	388.171	C16H10N3OCl2F3			3.6273	FC(F)(F)c1nc2ccccn2c1C(=O)NCc3cc(Cl)cc(Cl)c3	0.775
204	PathogenBox_PlateC	E05	MMV687146	TUBERCULOSIS		298.423	298.423	C19H26N2O			4.8488	Cc1cc(C)c2cc([nH]c2c1)C(=O)NC3CCCCCCC3	1.05
205	PathogenBox_PlateC	E06	MMV687696	TUBERCULOSIS		557.006	557.006	C29H28N4O2ClF3			6.6089	CCc1nc2ccc(Cl)cn2c1C(=O)NCc3ccc(cc3)N4CCC(CC4)c5ccc(OC(F)(F)F)cc5	1
206	PathogenBox_PlateC	E07	MMV687170	TUBERCULOSIS		340.764	340.764	C17H13N4O2Cl			3.2232	COc1ccc(Cn2cnc3c(nc(Cl)nc23)c4occc4)cc1	1.025
207	PathogenBox_PlateC	E08	MMV690102	KINETOPLASTIDS		417.46	417.46	C22H23N7O2			2.7956	COc1ccc(Oc2ccc(cc2)[C@@H](C)N(C)c3ncc4c(N)nc(N)nc4n3)cc1	2.05
208	PathogenBox_PlateC	E09	MMV689709	KINETOPLASTIDS		351.402	351.402	C19H21N5O2			1.2126	O=C(N1CC(C2=CC(NC)=CC(C)=N2)OCC1)C3=NNC4=C3C=CC=C4	2.05
209	PathogenBox_PlateC	E10	MMV021375	MALARIA		280.375	280.375	C17H20N4			2.8658	CC(C)CNc1cc(nc2c([nH]nc12)-c1ccccc1)C	0.87037
210	PathogenBox_PlateC	E11	MMV1029203	MALARIA		375.454	375.454	C20H17N5OS			2.6062	CNC(=O)CNc1nc(nc2scc(c3ccccc3)c12)c4ccccn4	0.462963
211	PathogenBox_PlateC	F02	MMV676053	CRYPTOSPORIDIOSIS		357.791	357.791	C18H16N3O3Cl			2.8599	COc1cc(NC(=O)CC2=NN(C)C(=O)c3ccccc23)ccc1Cl	1.2963
212	PathogenBox_PlateC	F03	MMV688179	KINETOPLASTIDS		476.185	403.265	C18H16N6OCl2	Hydrochloride	2	2.8711	NC(=N)Nc1ccc(c(Cl)c1)c2oc(cc2)c3ccc(NC(=N)N)cc3Cl	2
213	PathogenBox_PlateC	F04	MMV023969	TUBERCULOSIS		453.007	416.547	C24H24N4OS	Hydrochloride	1	3.8604	C(Nc1cccnc1)c2ccc(s2)c3cc4ccncc4cc3OC5CCNCC5	1.33333
214	PathogenBox_PlateC	F05	MMV687138	TUBERCULOSIS		339.408	339.408	C19H17NO3S			3.5455	NC(=O)c1cc(ccc1OCCOc2ccccc2)c3ccsc3	1.75926
215	PathogenBox_PlateC	F06	MMV688262	TUBERCULOSIS	Delamanid	534.484	534.484	C25H25N4O6F3			5.0428	CC1(COc2ccc(cc2)N3CCC(CC3)Oc4ccc(OC(F)(F)F)cc4)Cn5cc(nc5O1)N(=O)=O	0.232143
216	PathogenBox_PlateC	F07	MMV687189	TUBERCULOSIS		336.384	336.384	C20H20N2O3			2.7353	COc1ccc2nc(C)cc(OCC(=O)NCc3ccccc3)c2c1	0.0535714
217	PathogenBox_PlateC	F08	MMV687807	TUBERCULOSIS		383.673	383.673	C15H8NO2ClF6			4.764	Oc1ccc(Cl)cc1C(=O)Nc2ccc(c(c2)C(F)(F)F)C(F)(F)F	0.517857
218	PathogenBox_PlateC	F09	MMV676478	TUBERCULOSIS		435.585	435.585	C24H29N5OS			4.4242	O=C(C1CCN(CC1)c2nnc(s2)n3cccc3)N4CCC(Cc5ccccc5)CC4	0.660714
219	PathogenBox_PlateC	F10	MMV062221	MALARIA		279.347	279.347	C16H17N5			2.978	Cc1cc(C)nc(n1)n2nc(C)cc2Nc3ccccc3	0.767857
220	PathogenBox_PlateC	F11	MMV688921	DENGUE		451.859	451.859	C23H18N3O5Cl			3.2418	OC[C@H]1O[C@H](C(O)[C@H]1O)n2c3ccc(Cl)cc3c4c(ncnc24)c5oc6ccccc6c5	1.10714
221	PathogenBox_PlateC	G02	MMV676191	CRYPTOSPORIDIOSIS		244.286	244.286	C15H16O3			2.946	CC(C)C(Oc1cccc2ccccc12)C(=O)O	0.875
222	PathogenBox_PlateC	G03	MMV675993	CRYPTOSPORIDIOSIS		313.354	313.354	C16H19N5O2			1.7862	COc1ccc(cc1OC)c2nn(C(C)C)c3ncnc(N)c23	0.75
223	PathogenBox_PlateC	G04	MMV021660	TUBERCULOSIS		425.9	380.883	C20H21N6Cl	Formate	1	4.0588	Cc1cc(NCCc2ccccc2)nc(NC(=N)Nc3ccc(Cl)cc3)n1	1.625
224	PathogenBox_PlateC	G05	MMV688417	TOXOPLASMOSIS		326.784	326.784	C16H15N6Cl			2.6626	CC(C)n1nc(-c2cc3c(Cl)cccc3[nH]2)c2c(N)ncnc12	1.3125
225	PathogenBox_PlateC	G06	MMV687273	TUBERCULOSIS		330.551	330.551	C22H38N2			4.9188	CC(=CCC\C(=C/CNCCNC1C2CC3CC(CC1C3)C2)\C)C	1.3125
226	PathogenBox_PlateC	G07	MMV687180	TUBERCULOSIS		458.476	458.476	C24H25N4O2F3			4.0237	CCc1ccc(cc1)[C@@H]2C[C@@H](n3ncc(C(=O)NCc4ccc(OC)cc4)c3N2)C(F)(F)F	1.875
227	PathogenBox_PlateC	G08	MMV1088520	MALARIA		327.45	327.45	C18H21N3OS			2.852	CC(C)N(Cc1ccccn1)Cc2csc(n2)c3oc(C)cc3	0
228	PathogenBox_PlateC	G09	MMV688891	TUBERCULOSIS		442.183	442.183	C18H11NO4BrF3			3.8272	COc1cc(Br)cc2C=C(C(=O)Nc3cccc(c3)C(F)(F)F)C(=O)Oc12	0.645833
229	PathogenBox_PlateC	G10	MMV023370	MALARIA		311.736	311.736	C14H10N7Cl			1.0162	Nc1ncc(cc1c2nc3cc(Cl)cnc3[nH]2)c4cn[nH]c4	1.125
230	PathogenBox_PlateC	G11	MMV688703	TOXOPLASMOSIS		335.418	335.418	C21H22N3F			4.0276	CN1CCC(CC1)c1cc(c([nH]1)-c1ccc(F)cc1)-c1ccncc1	1.1875
231	PathogenBox_PlateC	H02	MMV675969	ONCHOCERCIASIS		340.459	340.459	C21H28N2O2			4.235	CC(C)(C)c1ccc(N[C@@H]2CCCC[C@H]2NC(=O)c3occc3)cc1	0.3125
232	PathogenBox_PlateC	H03	MMV688313	SCHISTOSOMIASIS		373.448	373.448	C23H23N3O2			4.561	COc1ccc(cc1OC)-c1nnc2ccc(cn12)-c1cccc(c1)C(C)C	1.125
233	PathogenBox_PlateC	H04	MMV687172	TUBERCULOSIS		387.477	387.477	C23H25N5O			3.6328	O=C(C1CCN(CC1)c2cc(ncn2)n3cccc3)N4CCc5ccccc5C4	0.430556
234	PathogenBox_PlateC	H05	MMV688844	TUBERCULOSIS		424.923	424.923	C23H25N4O2Cl			3.826	COc1ccc2nccc(NC(=O)C3CCN(CCc4ccc(Cl)cc4)CC3)c2n1	0.722222
235	PathogenBox_PlateC	H06	MMV1198433	SCHISTOSOMIASIS		339.395	339.395	C19H21N3O3			2.6117	CC(C)c1ccc(NC(=O)COC2=CC(=C(C#N)C(=O)N2C)C)cc1	1.02778
236	PathogenBox_PlateC	H07	MMV024311	TUBERCULOSIS		364.318	291.398	C19H21N3	Hydrochloride	2	3.5845	Cc1ccc2[nH]c(C3CCCNC3)c(c4ccncc4)c2c1	0.388889
237	PathogenBox_PlateC	H08	MMV1019989	MALARIA		328.464	328.464	C18H28N6			2.3137	CCc1ccc(cc1)C(NCc2nc(N)nc(n2)N(C)C)C(C)C	0.486111
238	PathogenBox_PlateC	H09	MMV1037162	MALARIA		355.464	355.464	C18H21N5OS			2.3916	CCNC(=O)C(C)Nc1nc(nc2sc(C)c(C)c12)c3cccnc3	1.18056
239	PathogenBox_PlateC	H10	MMV689437	KINETOPLASTIDS		364.232	364.232	C15H15N7Cl2			2.682	CC(N(C)c1ncc2c(N)nc(N)nc2n1)c3cc(Cl)cc(Cl)c3	0.1875
240	PathogenBox_PlateC	H11	MMV688955	TOXOPLASMOSIS		334.711	334.711	C15H11N2O5Cl			3.1627	Cc1cc(NC(=O)c2ccc(Oc3ccc(Cl)cc3O)o2)no1	0.395833
241	PathogenBox_PlateD	A02	MMV026468	MALARIA		310.784	310.784	C18H15N2OCl			3.857	OCc1ccc(cc1)c2cncc(Nc3cccc(Cl)c3)c2	0.5625
242	PathogenBox_PlateD	A03	MMV020670	MALARIA		387.443	387.443	C22H21N5O2			2.1488	COc1ccc(cc1)c2cncc3ccc(nc23)C(=O)NCCCn4ccnc4	2.6875
243	PathogenBox_PlateD	A04	MMV023953	MALARIA		400.526	400.526	C25H28N4O			4.409	O=C(Nc1cccc(c1)c2ccc(NCCCN3CCCC3)nc2)c4ccccc4	2.375
244	PathogenBox_PlateD	A05	MMV010576	MALARIA		370.427	370.427	C19H18N2O4S			2.2375	COc1cc(ccc1O)c2cc(cnc2N)c3ccc(cc3)S(=O)(=O)C	3.125
245	PathogenBox_PlateD	A06	MMV032967	MALARIA		369.35	369.35	C19H14N5F3			3.1652	FC(F)(F)c1cccc(c1)c2nc3c(NCc4ccncc4)nccc3[nH]2	3.3125
246	PathogenBox_PlateD	A07	MMV031011	MALARIA		436.987	436.987	C25H29N4OCl			3.5802	CNC(=O)C1Cc2c([nH]c3cc(Cl)ccc23)C4(CCN(CCc5ccccc5)CC4)N1	5.6875	3.7
247	PathogenBox_PlateD	A08	MMV688178	SCHISTOSOMIASIS		363.411	363.411	C24H17N3O			4.5932	O(c1ccccc1)c1ccc(cc1)-c1cncc(n1)-c1ccc2[nH]ccc2c1	1
248	PathogenBox_PlateD	A09	MMV688362	KINETOPLASTIDS		360.409	360.409	C21H20N4O2			2.5332	COc1cc(cc2cc(oc12)c3ccc(cc3)C4=NCCN4)C5=NCCN5	12.619	14.8
249	PathogenBox_PlateD	A10	MMV687706	KINETOPLASTIDS		356.848	320.388	C19H20N4O	Hydrochloride	1	2.5759	C1CN(CCN1)c2cc(n[nH]2)c3ccc(Oc4ccccc4)cc3	-0.0238095
250	PathogenBox_PlateD	A11	MMV026356	MALARIA		397.483	397.483	C20H27N7O2			-0.0134	CCn1ncc2c(NC3CCOCC3)c(CNC(=O)c4ccnn4C)c(C)nc12	0.595238
251	PathogenBox_PlateD	B02	MMV011511	MALARIA		367.537	367.537	C23H33N3O			3.1917	COc1ccc(CCN2CCC(CC2)NCc3cccc(c3)N(C)C)cc1	0.761905
252	PathogenBox_PlateD	B03	MMV007625	MALARIA		409.556	409.556	C22H27N5OS			2.2917	Cc1cc(C)n(n1)c2ccc(NC(=O)C3CCN(Cc4cnc(C)s4)CC3)cc2	1.35714
253	PathogenBox_PlateD	B04	MMV007471	MALARIA		424.884	424.884	C23H21N2O4Cl			3.8619	COc1cc(OC)cc(c1)C(=O)NCC2Cc3cc(Cl)cc(c3O2)c4ccncc4	0.2
254	PathogenBox_PlateD	B05	MMV024829	MALARIA		380.536	380.536	C23H32N4O			3.978	CC(C)CN1CCC(CC1)N(C)c2cc(NC(=O)c3cccc(C)c3)ccn2	-0.0166667
255	PathogenBox_PlateD	B06	MMV045105	KINETOPLASTIDS		321.38	321.38	C19H19N3O2			2.7194	C1CN(CCO1)c2cc(n[nH]2)c3ccc(Oc4ccccc4)cc3	1.1
256	PathogenBox_PlateD	B07	MMV022029	MALARIA		449.617	449.617	C26H31N3O2S			3.7198	CN1CCC(CC1)NCc2cccc(c2)c3ccc(cc3)S(=O)(=O)NCc4ccccc4	-0.0166667
257	PathogenBox_PlateD	B08	MMV676064	ONCHOCERCIASIS		376.423	376.423	C23H21N2O2F			4.6054	CC(=O)N(CCN(C(=O)c1ccc(F)cc1)c2ccccc2)c3ccccc3	0.35
258	PathogenBox_PlateD	B09	MMV688180	KINETOPLASTIDS		495.425	495.425	C21H24N6O2Cl2S			2.564	Cc1nn(C)c(C)c1NS(=O)(=O)c2c(Cl)cc(cc2Cl)c3ccnc(c3)N4CCNCC4	0.15
259	PathogenBox_PlateD	B10	MMV024035	MALARIA		502.462	429.542	C25H23N3O2S	Hydrochloride	2	4.9437	O=C(Nc1ccccc1)c2ccc(s2)c3cc4ccncc4cc3OC5CCNCC5	2.7619
260	PathogenBox_PlateD	B11	MMV688941	TUBERCULOSIS		349.423	349.423	C22H23NO3			3.8993	COc1cc(CN2CCC3(CC2)C=Cc4ccccc34)cc5OCOc15	0.5
261	PathogenBox_PlateD	C02	MMV020291	MALARIA		407.577	407.577	C21H33N3O3S			2.8942	CC(N1CCN(CC1)S(=O)(=O)c2ccc(cc2)C(C)(C)C)C(=O)N3CCCC3	1.78571
262	PathogenBox_PlateD	C03	MMV006833	MALARIA		414.952	414.952	C19H27N2O4ClS			3.0437	Cc1cc(Cl)c(cc1OCC(=O)NC2CCCCC2)S(=O)(=O)N3CCCC3	1.59524
263	PathogenBox_PlateD	C04	MMV026490	MALARIA		372.472	372.472	C23H24N4O			3.3268	O=C(NCCc1ccccc1)c2cc(cnc2NCC3CC3)c4cccnc4	1.38095
264	PathogenBox_PlateD	C05	MMV687246	MALARIA		499.587	499.587	C26H25N7O2S			3.296	CN1CCN(CC1)S(=O)(=O)c2ccc(cc2)c3ccc4c(Nc5ccc6nn[nH]c6c5)ccnc4c3	2.83333
265	PathogenBox_PlateD	C06	MMV676162	KINETOPLASTIDS		358.347	358.347	C21H14N2O4			3.947	OC(=O)c1cccc2oc(nc12)c3ccccc3NC(=O)c4ccccc4	0.909091
266	PathogenBox_PlateD	C07	MMV024114	MALARIA		443.328	443.328	C19H15N4O2BrS			2.6337	Cc1ccc(cc1)S(=O)(=O)n2cc(c3ccnc(N)c3)c4cc(Br)cnc24	1.07576
267	PathogenBox_PlateD	C08	MMV688467	KINETOPLASTIDS		410.532	410.532	C22H26N4O2S			4.1565	CCCCN(CCCC)c1c(cc(cc1C#N)S(=O)(=O)Nc2ccccc2)C#N	0.712121
268	PathogenBox_PlateD	C09	MMV675998	KINETOPLASTIDS		408.283	335.363	C17H17N7O	Hydrochloride	2	-0.4692	COc1ccc(cc1c2cn(nn2)c3ccc(cc3)C(=N)N)C(=N)N	1
269	PathogenBox_PlateD	C10	MMV659010	KINETOPLASTIDS		344.34	344.34	C18H15N4F3			3.5784	FC(F)(F)c1cc(NCCc2ccccc2)nc(n1)c3ccccn3	0.954545
270	PathogenBox_PlateD	C11	MMV676008	KINETOPLASTIDS		441.392	441.392	C24H15N3O6			3.8158	OC(=O)c1cccc2oc(nc12)c3cccc(O)c3NC(=O)c4cc(on4)c5ccccc5	1.72727
271	PathogenBox_PlateD	D02	MMV676269	MALARIA		356.434	356.434	C21H25N2O2F			3.054	C[C@@H](N1CCCC[C@H]1c2ccc(OCc3cccc(F)c3)cc2)C(=O)N	0.212121
272	PathogenBox_PlateD	D03	MMV020081	MALARIA		381.451	381.451	C22H24N3O2F			3.944	COc1cccc(CC(=O)N2CCC(CC2)n3c(C)nc4ccc(F)cc34)c1	0.151515
273	PathogenBox_PlateD	D04	MMV026550	MALARIA		321.424	321.424	C20H23N3O			3.0768	CC(C)(C)CN1C(=NC(C1=O)(c2ccccc2)c3ccccc3)N	0.454545
274	PathogenBox_PlateD	D05	MMV675995	ONCHOCERCIASIS		284.353	284.353	C17H20N2O2			2.8419	COc1ccc(cc1)N(CCc2cccc(C)n2)C(=O)C	0.318182
275	PathogenBox_PlateD	D06	MMV688274	KINETOPLASTIDS		521.971	521.971	C27H25N5O3ClF			4.3162	Fc1cccc(COc2ccc(Nc3ncnc4ccc(NC(=O)CN5CCOCC5)cc34)cc2Cl)c1	1.01515
276	PathogenBox_PlateD	D07	MMV023860	MALARIA		370.431	370.431	C18H18N4O3S			1.5408	NS(=O)(=O)c1cccc(c1)c2ccc3ncc(nc3c2)N4CCOCC4	1.63636
277	PathogenBox_PlateD	D08	MMV688407	KINETOPLASTIDS		387.438	387.438	C21H21N7O			0.896	COc1cc(ccc1c2cn(nn2)c3cccc(c3)C4=NCCN4)C5=NCCN5	7.98611	13.13
278	PathogenBox_PlateD	D09	MMV023949	MALARIA		429.528	429.528	C24H27N7O			2.2874	CC(C)(C)c1cc(C(=O)N2CCN(CC2)c3nccnc3C#N)n(Cc4ccccc4)n1	0.680556
279	PathogenBox_PlateD	D10	MMV676050	CRYPTOSPORIDIOSIS		450.557	450.557	C23H26N6O2S			2.661	CS(=O)(=O)N1CCC(Cn2nc(Cc3cccc4ccccc34)c5c(N)ncnc25)CC1	0.833333
280	PathogenBox_PlateD	D11	MMV024406	MALARIA		428.323	428.323	C21H19N5OCl2			3.6423	Clc1cccc(NC(=O)c2cnc(N3CCN(CC3)c4ccncc4)c(Cl)c2)c1	5.15278	2.3
281	PathogenBox_PlateD	E02	MMV023233	MALARIA		260.3	260.3	C16H12N4			2.1289	Nc1nccc2ccc(cc12)c3ccc4nccn4c3	0.916667
282	PathogenBox_PlateD	E03	MMV085230	MALARIA		316.401	316.401	C18H24N2O3			2.9678	CCCNC(=O)N1CCC2(CC1)CC(=O)c3cc(C)ccc3O2	1.01389
283	PathogenBox_PlateD	E04	MMV085071	MALARIA		348.41	348.41	C19H20N6O			0.9612	COc1cncc(c1)c2cncc(n2)N3CCN(CC3)c4ccncc4	1.19231
284	PathogenBox_PlateD	E05	MMV659004	KINETOPLASTIDS		364.88	364.88	C21H21N4Cl			4.387	Cc1nc(nc(N2CCC(Cc3ccccc3)C2)c1Cl)c4ccccn4	0.192308
285	PathogenBox_PlateD	E06	MMV676260	MALARIA		329.347	329.347	C17H17N5F2			2.2327	CN1CCN(CC1)c2nccc3nc([nH]c23)c4ccc(F)c(F)c4	0.634615
286	PathogenBox_PlateD	E07	MMV688364	TOXOPLASMOSIS		459.543	459.543	C25H29N7O2			3.4504	CC(C)(C)OC(=O)N1CCC(Cn2nc(-c3cnc4ccccc4c3)c3c(N)ncnc23)CC1	0.615385
287	PathogenBox_PlateD	E08	MMV032995	MALARIA		400.199	400.199	C17H13NO2BrF3			3.2553	FC(F)(F)c1ccc(CN2C(=O)COCc3ccc(Br)cc23)cc1	0.903846
288	PathogenBox_PlateD	E09	MMV688279	KINETOPLASTIDS		397.941	397.941	C23H28N3OCl			4.6649	CC1=Nc2ccc(Cl)cc2C(O)(N1CCN3CCCCC3)c4ccc(C)cc4	0.826923
289	PathogenBox_PlateD	E10	MMV688271	KINETOPLASTIDS		476.185	403.265	C18H16N6OCl2	Hydrochloride	2	2.6504	NC(=N)Nc1ccc(cc1Cl)c2oc(cc2)c3ccc(N=C(N)N)c(Cl)c3	2.02381
290	PathogenBox_PlateD	E11	MMV019790	MALARIA		372.428	372.428	C22H20N4O2			3.4924	CCOc1ccccc1C(=O)Nc2cccc(c2)c3nc4ncccn4c3C	1.61905
291	PathogenBox_PlateD	F02	MMV009135	MALARIA		388.475	388.475	C22H24N6O			2.4878	O=C(C1CCN(CC1)c2nnnn2c3ccccc3)N4CCc5ccccc5C4	1.2381
292	PathogenBox_PlateD	F03	MMV011765	MALARIA		358.729	358.729	C13H6N4OClF3S			3.0978	FC(F)(F)c1cnc(Sc2oc(nn2)c3ccncc3)c(Cl)c1	1.57143
293	PathogenBox_PlateD	F04	MMV024937	MALARIA		453.851	417.391	C20H18N5O2F3	Hydrochloride	1	2.8548	FC(F)(F)c1nc(oc1C(=O)Nc2ccc(nc2)N3CCNCC3)c4ccccc4	2.92857
294	PathogenBox_PlateD	F05	MMV085499	MALARIA		315.336	315.336	C18H13N5O			1.7552	NC(=O)c1ccc(cc1)c2nc(cnc2N)c3ccc(cc3)C#N	2.42857
295	PathogenBox_PlateD	F06	MMV023985	MALARIA		324.384	324.384	C18H20N4O2			2.0149	COc1ccc(cc1OC)c2cnc3ccc(nn23)N4CCCC4	1.98333
296	PathogenBox_PlateD	F07	MMV024195	MALARIA		424.571	424.571	C22H28N6OS			2.9135	CN(C)CCNC(=O)N1CCCN(CC1)c2ncnc3cc(sc23)c4ccccc4	0.216667
297	PathogenBox_PlateD	F08	MMV676063	ONCHOCERCIASIS		489.624	489.624	C30H36N3O2F			7.1155	CCCCc1ccc(NC(=O)Nc2ccc(O[C@H]3CCCC[C@@H]3N(C)c4ccccc4)c(F)c2)cc1	0
298	PathogenBox_PlateD	F09	MMV676186	KINETOPLASTIDS		469.446	469.446	C26H19N3O6			4.5194	COC(=O)c1cccc2oc(nc12)c3cccc(OC)c3NC(=O)c4cc(on4)c5ccccc5	0.1
299	PathogenBox_PlateD	F10	MMV688474	KINETOPLASTIDS		477.472	387.438	C21H21N7O	Formate	2	0.896	COc1cc(ccc1n2cc(nn2)c3cccc(c3)C4=NCCN4)C5=NCCN5	0.216667
300	PathogenBox_PlateD	F11	MMV687812	TUBERCULOSIS		534.509	534.509	C24H26N8O2F4			2.3491	CN1CCN(CCCOc2ncc(Nc3ncc(nc3C(=O)N)c4ccc(c(F)c4)C(F)(F)F)cn2)CC1	4.11667
301	PathogenBox_PlateD	G02	MMV007803	MALARIA		321.826	321.826	C16H16NO2ClS			3.415	Clc1ccccc1CSCc2oc(cc2)C(=O)NC3CC3	0.148148
302	PathogenBox_PlateD	G03	MMV001059	MALARIA		379.441	379.441	C17H24NO3F3S			3.5317	CCCS(=O)(=O)N1CCC(CO)(Cc2ccccc2C(F)(F)F)CC1	0.0925926
303	PathogenBox_PlateD	G04	MMV011691	MALARIA		391.431	391.431	C21H21N5O3			2.4348	NCC(=O)N1CCn2c(C1)nc(c2Nc3ccc4OCOc4c3)c5ccccc5	1.31481
304	PathogenBox_PlateD	G05	MMV676877	MALARIA		315.794	315.794	C18H18NO2Cl			3.3259	OCCNc1ccc(cc1)C(=O)C2C[C@H]2c3ccc(Cl)cc3	0
305	PathogenBox_PlateD	G06	MMV663250	MALARIA		366.896	366.896	C21H23N4Cl			3.1529	Clc1cccc(c1)C(c2ccc(CN3CCNCC3)cc2)n4ccnc4	0.277778
306	PathogenBox_PlateD	G07	MMV407539	WOLBACHIA LF		448.545	448.545	C24H24N4O3S			3.9164	CCc1nc2ccc(cn2c1N(C)Cc3cccs3)C(=O)NCc4ccc5OCOc5c4	0.240741
307	PathogenBox_PlateD	G08	MMV688372	KINETOPLASTIDS		401.436	401.436	C23H20N5OF			4.4344	FC1=C(C=C(NC(=O)N2CCCC2)C=C1)C1=NC2=CC(=CN=C2N1)C1=CC=CC=C1	0.875
308	PathogenBox_PlateD	G09	MMV658993	KINETOPLASTIDS		402.904	402.904	C19H19N4O2ClS			2.682	Cc1nc(nc(NCCc2ccc(cc2)S(=O)(=O)C)c1Cl)c3ccccn3	0.75
309	PathogenBox_PlateD	G10	MMV676182	CRYPTOSPORIDIOSIS		372.466	372.466	C22H24N6			2.7895	Nc1ncnc2c1c(Cc3cccc4ccccc34)nn2CC5CCNCC5	0
310	PathogenBox_PlateD	G11	MMV676411	TUBERCULOSIS		325.385	325.385	C17H15N3O2S			3.2069	CC(Oc1ccccc1)C(=O)Nc2nc(cs2)c3ccccn3	0.0833333
311	PathogenBox_PlateD	H02	MMV007133	MALARIA		413.496	413.496	C21H23N3O4S			3.369	CC(C)N(Cc1ccccc1)S(=O)(=O)c2ccc(cc2)C(=O)Nc3cc(C)on3	0.416667
312	PathogenBox_PlateD	H03	MMV022478	MALARIA		545.93	432.915	C23H21N6OCl	Trifluoroacetate	1	2.5545	Clc1cccc(c1)c2cnn3ccc(nc23)C(=O)Nc4ccc(cc4)N5CCNCC5	2.04167
313	PathogenBox_PlateD	H04	MMV024101	MALARIA		461.756	352.376	C16H12N6O2S	Hydrochloride	3	0.1633	NS(=O)(=O)c1cncc(c1)c2ccc3nccc(c4cn[nH]c4)c3n2	0.428571
314	PathogenBox_PlateD	H05	MMV676881	MALARIA		300.266	300.266	C14H10N6F2			2.1762	CCn1cnc2c(Nc3cc(F)cc(F)c3)nc(nc12)C#N	0.535714
315	PathogenBox_PlateD	H06	MMV024443	MALARIA		328.375	328.375	C20H16N4O			3.2459	CN(C(=O)c1cc2c(cccc2[nH]1)c3cncnc3)c4ccccc4	-0.0357143
316	PathogenBox_PlateD	H07	MMV688469	TOXOPLASMOSIS		275.308	275.308	C16H13N5			2.3282	Nc1ncnc2[nH]nc(Cc3cccc4ccccc34)c12	0.357143
317	PathogenBox_PlateD	H08	MMV023388	MALARIA		385.389	385.389	C21H18N3OF3			3.917	FC(F)(F)c1cccc(c1)C(=O)NC2CCN(C2)c3ccnc4ccccc34	-0.0357143
318	PathogenBox_PlateD	H09	MMV675968	CRYPTOSPORIDIOSIS		359.81	359.81	C17H18N5O2Cl			2.3107	COc1ccc(OC)c(NCc2ccc3nc(N)nc(N)c3c2Cl)c1	4.96429
319	PathogenBox_PlateD	H10	MMV675996	ONCHOCERCIASIS		352.47	352.47	C22H28N2O2			4.186	COc1ccc(cc1)N(CCc2cccc(C)n2)C(=O)C3CCCCC3	5.95833	4.9
320	PathogenBox_PlateD	H11	MMV688980	MALARIA		335.396	335.396	C16H18N3O2FS			2.2828	CCC1=CC(=O)N(C)C(=N1)SC(C)C(=O)Nc2ccc(F)cc2	1.29167
321	PathogenBox_PlateE	A02	MMV011229	MALARIA		292.26	292.26	C14H11N4F3			2.9885	CC1=NC2=NC=CN2C(NC3=CC=C(C(F)(F)F)C=C3)=C1	0.204545
322	PathogenBox_PlateE	A03	MMV676468	TUBERCULOSIS		335.442	335.442	C10H8NOCl5			3.6765	NC(CC(=O)c1ccc(Cl)cc1Cl)C(Cl)(Cl)Cl	0.840909
323	PathogenBox_PlateE	A04	MMV688771	SCHISTOSOMIASIS		325.428	325.428	C18H19N3OS			4.7276	Cc1ccccc1C(=O)N2N=C(Nc3ccccc3)SC2(C)C	0.386364
324	PathogenBox_PlateE	A05	MMV687798	REFERENCE COMPOUNDS	Levofloxacin (-)-ofloxacin	361.368	361.368	C18H20N3O4F			-0.3426	C[C@H]1COc2c(N3CCN(C)CC3)c(F)cc4C(=O)C(=CN1c24)C(=O)O	0.863636
325	PathogenBox_PlateE	A06	MMV688775	REFERENCE COMPOUNDS	Rifampicin	822.94	822.94	C43H58N4O12			1.2905	CO[C@H]1\C=C\O[C@@]2(C)OC3=C(C2=O)C4=C(O)\C(=C/NN5CCN(C)CC5)\C(=N\C(=O)\C(=C/C=C\[C@H](C)[C@H](O)[C@@H](C)[C@@H](O)[C@@H](C)[C@H](OC(=O)C)[C@@H]1C)\C)\C(=C4C(=C3C)O)O	1.13636
326	PathogenBox_PlateE	A07	MMV676159	KINETOPLASTIDS		339.819	339.819	C19H18N3OCl			3.7112	Clc1cccc(CO[C@H]2CCc3ccccc3[C@@H]2n4ccnn4)c1	0.954545
327	PathogenBox_PlateE	A08	MMV393144	MALARIA		310.376	310.376	C18H19N4F			2.6789	CN1CCN(CC1)c2nccc3[nH]c(cc23)c4cccc(F)c4	1.375
328	PathogenBox_PlateE	A09	MMV007920	MALARIA		329.352	329.352	C20H15N3O2			3.7846	Nc1ccc(cc1)C(=O)Nc2ccc(cc2)c3oc4ccccc4n3	0.875
329	PathogenBox_PlateE	A10	MMV688270	SCHISTOSOMIASIS		359.421	359.421	C22H21N3O2			3.7272	COc1ccc(cc1)-c1cnc2cnc(cn12)-c1cccc(OC(C)C)c1	0.0178571
330	PathogenBox_PlateE	A11	MMV019993	MALARIA		362.359	362.359	C17H17N6F3			2.0475	CC(Nc1nncc(n1)c2ccc(cc2)C(F)(F)F)c3cn(C)nc3C	0.25
331	PathogenBox_PlateE	B02	MMV687794	MALARIA		384.291	384.291	C15H18N3O2BrS			2.2604	CC1(C)Cc2c(CO1)c(nc3snc(Br)c23)N4CCOCC4	0.0714286
332	PathogenBox_PlateE	B03	MMV676470	TUBERCULOSIS		299.364	299.364	C18H21NO3			3.4061	CCOc1ccc(OCC(=O)Nc2cc(C)cc(C)c2)cc1	0.196429
333	PathogenBox_PlateE	B04	MMV688938	TUBERCULOSIS		356.457	356.457	C20H21N2OFS			4.0104	CCOc1ccc(cc1)c2nc(CNCCc3ccc(F)cc3)cs2	-0.25
334	PathogenBox_PlateE	B05	MMV689000	REFERENCE COMPOUNDS	Amphotericin B	924.079	924.079	C47H73NO17			0.323	C[C@@H]1OC(=O)C[C@H](O)C[C@H](O)CC[C@@H](O)[C@H](O)C[C@H](O)C[C@]2(O)C[C@H](O)[C@H]([C@H](C[C@@H](O[C@@H]3O[C@H](C)[C@@H](O)[C@H](N)[C@@H]3O)\C=C\C=C\C=C\C=C\C=C\C=C\C=C\[C@H](C)[C@@H](O)[C@H]1C)O2)C(=O)O	1.0625
335	PathogenBox_PlateE	B06	MMV004168	KINETOPLASTIDS		314.86	314.86	C19H23N2Cl			4.0247	CN1CCCN(CC1)C(c2ccccc2)c3ccc(Cl)cc3	0.9375
336	PathogenBox_PlateE	B07	MMV676161	KINETOPLASTIDS		335.4	335.4	C20H21N3O2			2.3449	C(N1CCOCC1)c2cc(n[nH]2)c3ccc(Oc4ccccc4)cc3	1.10417
337	PathogenBox_PlateE	B08	MMV023183	MALARIA		402.542	402.542	C25H30N4O			2.6132	C(C1CC1)N2Cc3ccccc3OC4(CCN(Cc5c[nH]c6cnccc56)CC4)C2	2.8125
338	PathogenBox_PlateE	B09	MMV047015	TUBERCULOSIS		256.227	256.227	C12H11N2OF3			2.4745	COc1cc(nc2ccc(C)c(N)c12)C(F)(F)F	2
339	PathogenBox_PlateE	B10	MMV688795	KINETOPLASTIDS		297.395	297.395	C18H23N3O			2.0697	O=C(NCCc1ccn(n1)c2ccccc2)C3CCCCC3	0.0454545
340	PathogenBox_PlateE	B11	MMV688352	DENGUE		525.001	525.001	C29H25N6O2Cl			4.176	Clc1ccc(cc1)[C@@H]2[C@H](Oc3ccccc3)C(=O)N2CCn4cnc5c(NCc6ccccc6)ncnc45	0.212121
341	PathogenBox_PlateE	C02	MMV676398	WOLBACHIA LF		360.427	360.427	C18H20N2O4S			2.8153	CCS(=O)(=O)N(Cc1occc1)Cc2cc3ccc(C)cc3nc2O	-0.166667
342	PathogenBox_PlateE	C03	MMV676472	TUBERCULOSIS		424.9	424.9	C22H17N2O3ClS			5.1053	COc1cccc(OC)c1C(=O)Nc2ccc(Cl)c(c2)c3nc4ccccc4s3	0.348485
343	PathogenBox_PlateE	C04	MMV671636	ONCHOCERCIASIS		447.359	447.359	C23H14NO3F5			5.4793	CC1=C(C(=O)c2c(F)cc(F)cc2N1)c3ccc(Oc4ccc(OC(F)(F)F)cc4)cc3	0.545455
344	PathogenBox_PlateE	C05	MMV676599	CRYPTOSPORIDIOSIS		331.414	331.414	C20H21N5			3.3637	CC(C)(C)n1nc(Cc2cccc3ccccc23)c4c(N)ncnc14	0.621212
345	PathogenBox_PlateE	C06	MMV689244	KINETOPLASTIDS		459.891	459.891	C24H21N3OClF3			4.9176	FC(F)(F)c1ccc(cc1)N2CCN(CC2)C(=O)[C@@H](c3ccc(Cl)cc3)c4cccnc4	1.8
346	PathogenBox_PlateE	C07	MMV688411	TOXOPLASMOSIS		359.428	359.428	C20H21N7			1.7914	Nc1ncnc2n(CC3CCNCC3)nc(-c3cnc4ccccc4c3)c12	2.05
347	PathogenBox_PlateE	C08	MMV687765	TUBERCULOSIS		462.974	426.514	C25H26N6O	Hydrochloride	1	3.4715	Cc1cnc(nc1Oc2ccc(cc2)n3ccnc3)N4CCN[C@@H](Cc5ccccc5)C4	2.15
348	PathogenBox_PlateE	C09	MMV020165	MALARIA		379.382	379.382	C19H20N3O2F3			3.1517	CC(C)NCC(=O)Nc1cccc(c1)C(=O)Nc2cccc(c2)C(F)(F)F	4.25
349	PathogenBox_PlateE	C10	MMV676524	TUBERCULOSIS		219.67	219.67	C11H10N3Cl			2.4692	Nc1cccnc1Nc2ccc(Cl)cc2	6.4	12.2
350	PathogenBox_PlateE	C11	MMV611037	TUBERCULOSIS		334.42	334.42	C14H14N4O2S2			3.3215	CCC(Sc1oc2ccccc2n1)C(=O)Nc3nnc(C)s3	0.9
351	PathogenBox_PlateE	D02	MMV688766	SCHISTOSOMIASIS		369.722	369.722	C17H11NO3ClF3			4.5719	COc1ccc(c(O)c1)c2onc(c2c3ccc(Cl)cc3)C(F)(F)F	0.9375
352	PathogenBox_PlateE	D03	MMV200748	TUBERCULOSIS		374.283	374.283	C19H20NO2Br			4.2677	COc1ccc(cc1)C2(CCCC2)C(=O)Nc3ccc(Br)cc3	1.40625
353	PathogenBox_PlateE	D04	MMV667494	MALARIA		494.03	494.03	C25H34N5OClF2			4.3904	FC1(F)CCN(CCCCNc2cc(c3cc(ccc3n2)Cl)C(=O)NCCN2CCCC2)CC1	0.34375
354	PathogenBox_PlateE	D05	MMV028694	MALARIA		332.367	332.367	C18H16N6O			2.1153	OCCc1ccc(Nc2nccc(n2)c3nnc4ccccn34)cc1	1.5
355	PathogenBox_PlateE	D06	MMV001499	REFERENCE COMPOUNDS	Nifurtimox	287.294	287.294	C10H13N3O5S			-0.2513	CC1CS(=O)(=O)CCN1\N=C\c2oc(cc2)[N+](=O)[O-]	2.4375
356	PathogenBox_PlateE	D07	MMV688345	TOXOPLASMOSIS		311.405	311.405	C16H17N5S			1.7171	Nc1nc(N)c2c3CCN(Cc4ccccc4)Cc3sc2n1	2.84375
357	PathogenBox_PlateE	D08	MMV010545	MALARIA		410.456	410.456	C19H18N6O3S			0.7735	COc1ccc(cn1)c2cnc3ccc(NCc4ccc(cc4)S(=O)(=O)N)nn23	0.462963
358	PathogenBox_PlateE	D09	MMV023227	MALARIA		277.371	277.371	C18H19N3			3.3237	Cc1nc([nH]c1C)c2cccc(NCc3ccccc3)c2	1.37037
359	PathogenBox_PlateE	D10	MMV687700	TUBERCULOSIS		584.505	466.425	C17H18N6O8S	Acetate	2	-0.8449	Nc1ncnc2c1ncn2[C@@H]3O[C@H](COS(=O)(=O)NC(=O)c4ccccc4O)[C@@H](O)[C@H]3O	1.05556
360	PathogenBox_PlateE	D11	MMV676384	TUBERCULOSIS		307.322	307.322	C18H14N3OF			3.712	Fc1ccccc1c2oc(NCCc3ccccc3)c(n2)C#N	0.981481
361	PathogenBox_PlateE	E02	MMV020289	MALARIA		361.459	361.459	C18H23N3O3S			3.117	Cc1ccc(NC(=O)c2cc(ccc2C)S(=O)(=O)NC(C)(C)C)nc1	1.35185
362	PathogenBox_PlateE	E03	MMV002816	REFERENCE COMPOUNDS	Diethylcarbamazine	199.298	199.298	C10H21N3O			0.8076	CCN(CC)C(=O)N1CCN(C)CC1	1.48148
363	PathogenBox_PlateE	E04	MMV634140	MALARIA		431.968	431.968	C22H30N5O2Cl			2.1784	Clc1ccc2nc(cc(c2c1)C(=O)NCCN1CCCC1)NCCN1CCOCC1	0.916667
364	PathogenBox_PlateE	E05	MMV030734	MALARIA		584.864	358.833	C17H19N6OCl	Trifluoroacetate	2	1.9474	CC(C)(CN)c1nc(c2ccc(Cl)c(O)c2)c([nH]1)c3ccnc(N)n3	3.5
365	PathogenBox_PlateE	E06	MMV689243	KINETOPLASTIDS		466.422	466.422	C23H20N4F6			4.2575	FC(F)(F)c1ccc(cc1)N(C2CCN(CC2)c3ccc(cn3)C(F)(F)F)c4cccnc4	1.44444
366	PathogenBox_PlateE	E07	MMV676358	MALARIA		324.564	324.564	C11H7N5BrCl			2.1886	Nc1ncc(Br)cc1c2nc3cc(Cl)cnc3[nH]2	4.83333
367	PathogenBox_PlateE	E08	MMV687729	TUBERCULOSIS		400.418	400.418	C22H22N2O3F2			2.6774	OC[C@H]1CN(C(=O)O1)c2cc(F)c(C3=CCN(Cc4ccccc4)CC3)c(F)c2	1.52778
368	PathogenBox_PlateE	E09	MMV407834	MALARIA		437.462	437.462	C22H26N3O3F3			3.3119	CCOc1ccccc1NC(C)C(=O)Nc2cc(ccc2N3CCOCC3)C(F)(F)F	2.30556
369	PathogenBox_PlateE	E10	MMV687813	TUBERCULOSIS		467.465	467.465	C25H23N3O4F2			3.3845	Fc1cc(cc(F)c1C2=CCN(Cc3ccccc3)CC2)N4C[C@H](COc5ccon5)OC4=O	1
370	PathogenBox_PlateE	E11	MMV153413	TUBERCULOSIS		422.328	422.328	C16H11N2O4F5S			3.1178	CCOC(=O)c1c(C)c(sc1NC(=O)c2c(F)c(F)c(F)c(F)c2F)C(=O)N	1.33333
371	PathogenBox_PlateE	F02	MMV019551	MALARIA		354.4	354.4	C20H22N2O4			2.9614	CCC(NC(=O)c1ccccc1NC(=O)c2ccc(C)cc2)C(=O)OC	0.266667
372	PathogenBox_PlateE	F03	MMV688552	SCHISTOSOMIASIS		393.386	393.386	C17H14N5OF3S			3.4154	CC(C(SC1=NC=CC=N1)=C2C)=NN2C(NC3=CC=CC(C(F)(F)F)=C3)=O	0.8
373	PathogenBox_PlateE	F04	MMV016838	MALARIA		418.299	418.299	C22H16N3OBr			4.9415	Cc1ccc(cc1)-c1cc(c2cc(ccc2n1)Br)C(=O)Nc1cccnc1	0.75
374	PathogenBox_PlateE	F05	MMV676270	MALARIA		356.434	356.434	C21H25N2O2F			3.054	C[C@@H](N1CCCC[C@@H]1c2ccc(OCc3cccc(F)c3)cc2)C(=O)N	0.883333
375	PathogenBox_PlateE	F06	MMV688755	TUBERCULOSIS		359.257	359.257	C14H12N3O5F3			2.811	[O-][N+](=O)c1cn2C[C@@H](COc2n1)OCc3ccc(OC(F)(F)F)cc3	0.383333
376	PathogenBox_PlateE	F07	MMV228911	TUBERCULOSIS		393.465	393.465	C21H19N3O3S			3.7547	COc1cccc(NC(=O)c2c3CCCc3sc2NC(=O)c4cccnc4)c1	2.23333
377	PathogenBox_PlateE	F08	MMV272144	TUBERCULOSIS		254.268	254.268	C9H10N4O3S			-0.2677	COc1cccc(c1)n2nnnc2S(=O)(=O)C	0.716667
378	PathogenBox_PlateE	F09	MMV026313	MALARIA		237.262	237.262	C14H11N3O			1.9219	Nc1nccc2ccc(Oc3ccncc3)cc12	1.36667
379	PathogenBox_PlateE	F10	MMV161996	TUBERCULOSIS		408.948	408.948	C20H25N2O3ClS			4.4139	CC(C)CNS(=O)(=O)c1ccc(CCC(=O)Nc2ccc(Cl)cc2C)cc1	1.18333
380	PathogenBox_PlateE	F11	MMV688543	DENGUE		442.632	442.632	C24H46N2O5			2.5494	CC(C)(C)C(=O)N(CCCCCCN1C[C@H](O)[C@@H](O)[C@H](O)[C@H]1CO)C2CCCCCC2	1.28333
381	PathogenBox_PlateE	G02	MMV146306	TUBERCULOSIS		364.489	364.489	C23H28N2O2			4.2713	CCC(C)NC(=O)c1ccc(NC(=O)C2(CCCC2)c3ccccc3)cc1	-0.652778
382	PathogenBox_PlateE	G03	MMV688557	TUBERCULOSIS		303.827	267.367	C12H13NO2S2	Hydrochloride	1	1.5596	NCC(c1cccs1)S(=O)(=O)c2ccccc2	0.569444
383	PathogenBox_PlateE	G04	MMV021013	TUBERCULOSIS		294.402	294.402	C18H22N4			3.5484	C1CCC(CC1)Nc2cc(nc(n2)c3ccccn3)C4CC4	0.0694444
384	PathogenBox_PlateE	G05	MMV392832	MALARIA		316.364	316.364	C19H16N4O			3.2592	COc1cccc(c1)c2cc3c(Nc4cccnc4)nccc3[nH]2	2.09722
385	PathogenBox_PlateE	G06	MMV688754	KINETOPLASTIDS	Trifloxystrobin	408.371	408.371	C20H19N2O4F3			4.4694	CO\N=C(/C(=O)OC)\c1ccccc1CO\N=C(/C)\c2cccc(c2)C(F)(F)F	1.15278
386	PathogenBox_PlateE	G07	MMV001561	KINETOPLASTIDS	Fluoxetine	309.331	309.331	C17H18NOF3			3.6241	CNCCC(Oc1ccc(cc1)C(F)(F)F)c2ccccc2	0.861111
387	PathogenBox_PlateE	G08	MMV658988	KINETOPLASTIDS		338.842	338.842	C19H19N4Cl			3.9294	CN(CCc1ccccc1)c2nc(nc(C)c2Cl)c3ccccn3	2.85
388	PathogenBox_PlateE	G09	MMV084864	MALARIA		316.324	316.324	C17H12N6O			2.0217	O=C(Nc1cnc2ccccc2c1)c3cccc(c3)n4cnnn4	1.5
389	PathogenBox_PlateE	G10	MMV676492	LYMPHATIC FILARIASIS		350.642	350.642	C9H5N3OBrClS2			3.417	Sc1nnc(NC(=O)c2cc(Br)ccc2Cl)s1	0.866667
390	PathogenBox_PlateE	G11	MMV688415	KINETOPLASTIDS		433.543	433.543	C26H31N3O3			2.7144	CO[C@@H]1CN(C[C@H]1O)c2ccc(C#CC3(O)CN4CCC3CC4)c(Cc5ccccc5)n2	1.01667
391	PathogenBox_PlateE	H02	MMV688330	TOXOPLASMOSIS		346.808	346.808	C18H19N2O3Cl			3.1506	CC(=O)N1CCN(CC1)c1ccc(Oc2ccc(Cl)cc2O)cc1	1.78333
392	PathogenBox_PlateE	H03	MMV687796	REFERENCE COMPOUNDS	Amikacin	781.763	585.603	C22H43N5O13	Sulfuric Acid	2	-8.5032	NCCC(O)C(=O)N[C@@H]1C[C@H](N)[C@@H](OC2O[C@H](CN)[C@@H](O)[C@H](O)[C@H]2O)[C@H](O)C1OC3O[C@H](CO)[C@@H](O)[C@H](N)[C@H]3O	1.18333
393	PathogenBox_PlateE	H04	MMV688939	TUBERCULOSIS		302.373	302.373	C19H18N4			2.6049	Cc1ccc2nc(C)c(c3ccn(Cc4ccccc4)n3)n2c1	-0.2
394	PathogenBox_PlateE	H05	MMV688978	REFERENCE COMPOUNDS	Auranofin	678.484	678.484	C20H34AuO9PS			1.4	CCP(=[Au]S[C@H]1O[C@@H](COC(=O)C)[C@H](OC(=O)C)[C@@H](OC(=O)C)[C@@H]1OC(=O)C)(CC)CC	0.85
395	PathogenBox_PlateE	H06	MMV688990	REFERENCE COMPOUNDS	Miltefosine	407.568	407.568	C21H46NO4P			0.1224	CCCCCCCCCCCCCCCCOP(=O)([O-])OCC[N+](C)(C)C	0.7
396	PathogenBox_PlateE	H07	MMV688273	KINETOPLASTIDS		394.829	394.829	C21H16N4OClF			4.6727	Nc1ccc2ncnc(Nc3ccc(OCc4cccc(F)c4)c(Cl)c3)c2c1	0.8
397	PathogenBox_PlateE	H08	MMV393995	TUBERCULOSIS		204.233	204.233	C10H12N4O			1.1019	Cc1cc(O)nc(n1)n2nc(C)cc2C	0.65
398	PathogenBox_PlateE	H09	MMV1236379	KINETOPLASTIDS		232.239	232.239	C12H12N2O3			1.7765	CCOC(=O)c1noc(N)c1c2ccccc2	1.2
399	PathogenBox_PlateE	H10	MMV688550	KINETOPLASTIDS		437.492	437.492	C23H27N5O4			2.6626	CCc1ccccc1n2c(C)cn3c4C(=O)N(C(C(C)C)C(=O)OC)C(=O)N(C)c4nc23	0.222222
400	PathogenBox_PlateE	H11	MMV495543	TUBERCULOSIS		276.358	276.358	C14H16N2O2S			3.7508	CC(C)(C)c1cnc(NC(=O)c2ccccc2O)s1	0.777778
401			PBST plus DMSO	n/a	PBST containing DMSO			na			n/a	n/a	0.1	1
402			Trehalose	n/a	Trehalose	378.33	342.3	C2H22O11	Dihydrate		-3.3	OC[C@@H]1[C@@H](O)[C@H](O)[C@@H](O)[C@H](O1)O[C@@H]2[C@H](O)[C@@H](O)[C@H](O)[C@H](O2)CO	6.66143	8.3
